# Supplementary material for: Quantifying tethered spinal cord tension: Ultrasound elastography results from computational, cadaveric, and intraoperative first-in-human studies
Source: Research Square preprint supplement (doi:10.21203/rs.3.rs-2922525/v1), 2023-06-16
Supplement: Supplementary file 1 [file f14f40198412a0ec8d94c3df.xlsx]

## Sheet: (1) Finite Element Simulation
Tension	SWV (m/s)	Squared SWV
0	1.39112	1.93522
32.057	2.20041	4.84179
64.114	2.71047	7.34664
96.171	3.06507	9.39464
128.228	3.34957	11.2196
160.285	3.59261	12.9069
192.342	3.8047	14.4757
224.399	3.97925	15.8344
256.456	4.15546	17.2678

## Sheet: (2) Cadaveric Benchtop Study
Tension	SWV(m/s)	Squared SWV
0	3.18	10.1124
0	3.17	10.0489
0	3.23	10.4329
1	3.34	11.1556
1	3.29	10.8241
1	3.21	10.3041
5	3.38	11.4244
5	3.49	12.1801
5	3.46	11.9716
10	3.59	12.8881
10	3.58	12.8164
10	3.49	12.1801
15	3.55	12.6025
15	3.63	13.1769
15	3.64	13.2496
20	3.71	13.7641
20	3.71	13.7641
20	3.65	13.3225
25	3.7	13.69
25	3.82	14.5924
25	3.76	14.1376
30	3.76	14.1376
30	3.84	14.7456
30	3.71	13.7641
35	3.91	15.2881
35	3.93	15.4449
35	3.83	14.6689
40	3.95	15.6025
40	3.96	15.6816
40	3.95	15.6025
45	3.76	14.1376
45	3.74	13.9876
45	3.77	14.2129
50	3.84	14.7456
50	3.78	14.2884
50	3.86	14.8996
55	3.81	14.5161
55	3.93	15.4449
55	3.86	14.8996
60	3.85	14.8225
60	3.8	14.44
60	3.87	14.9769
65	3.88	15.0544
65	3.91	15.2881
65	3.87	14.9769
70	3.94	15.5236
70	3.93	15.4449
70	3.87	14.9769
75	3.92	15.3664
75	3.93	15.4449
75	3.96	15.6816
80	4.01	16.0801
80	3.98	15.8404
80	3.99	15.9201
85	4.02	16.1604
85	4.02	16.1604
85	4.01	16.0801
90	4.15	17.2225
90	4.05	16.4025
90	4.07	16.5649
95	4.1	16.81
95	4.15	17.2225
95	4.05	16.4025
100	4.1	16.81
100	4.06	16.4836
100	4.11	16.8921
105	4.18	17.4724
105	4.11	16.8921
105	4.13	17.0569
110	4.18	17.4724
110	4.26	18.1476
110	4.35	18.9225
115	4.27	18.2329
115	4.25	18.0625
115	4.21	17.7241
120	4.32	18.6624
120	4.25	18.0625
120	4.24	17.9776
125	4.32	18.6624
125	4.32	18.6624
125	4.23	17.8929
130	4.42	19.5364
130	4.4	19.36
130	4.43	19.6249
135	4.4	19.36
135	4.34	18.8356
135	4.34	18.8356
140	4.36	19.0096
140	4.44	19.7136
140	4.43	19.6249
145	4.46	19.8916
145	4.47	19.9809
145	4.47	19.9809
150	4.43	19.6249
150	4.33	18.7489
150	4.31	18.5761
155	4.42	19.5364
155	4.44	19.7136
155	4.32	18.6624
160	4.37	19.0969
160	4.49	20.1601
160	4.34	18.8356
165	4.4	19.36
165	4.39	19.2721
165	4.45	19.8025
170	4.66	21.7156
170	4.61	21.2521
170	4.57	20.8849
175	4.64	21.5296
175	4.73	22.3729
175	4.63	21.4369
180	4.77	22.7529
180	4.61	21.2521
180	4.82	23.2324
185	4.63	21.4369
185	4.8	23.04
185	4.85	23.5225
190	4.77	22.7529
190	4.63	21.4369
190	4.62	21.3444
195	4.76	22.6576
195	4.85	23.5225
195	4.86	23.6196
200	4.59	21.0681
200	4.59	21.0681
200	4.65	21.6225
205	4.64	21.5296
205	4.67	21.8089
205	4.67	21.8089
210	4.86	23.6196
210	4.7	22.09
210	4.84	23.4256
215	4.78	22.8484
215	4.7	22.09
215	4.92	24.2064
220	4.9	24.01
220	4.98	24.8004
220	5.08	25.8064
225	4.93	24.3049
225	4.75	22.5625
225	4.96	24.6016
230	4.94	24.4036
230	4.68	21.9024
230	4.88	23.8144
235	4.87	23.7169
235	4.99	24.9001
235	4.89	23.9121
240	5.03	25.3009
240	5.11	26.1121
240	5.01	25.1001
245	4.94	24.4036
245	4.88	23.8144
245	4.87	23.7169
250	5.4	29.16
250	4.9	24.01
250	4.97	24.7009

## Sheet: (3) First-In-Human Data
Case A Tension	Case A Relax	Case B Tension	Case B Relax	Case C Tension	Case C Relax	Case D Tension	Case D Relax	Case E Tension	Case E Relax	Case F Tension	Case F Relax
2.405	1.57	2.1	1.645	1.83	1.525	1.96	1.86	1.92	1.69	1.955	1.305
2.355	1.45	2.05	1.705	1.74	1.645	2.05	1.6	1.85	1.72	1.855	1.35
2.32	1.485	2.12	1.64	1.76	1.605	1.99	1.84	1.84	1.63	2.115	1.3
2.39		1.98	1.65	1.705	1.65		1.79	1.82	1.835	2.045	1.52
2.305		1.985	1.715	1.8	1.55			1.85	1.735		1.37
											1.525
SWV (m/s)	/	/	/	/	/	/	/	/	/	/	/
medians of single image acquisition meeting PRE/POST criteria for each case

## Sheet: (3) Case A
Pre One (m/s)	Pre Two (m/s)	Pre Three (m/s)	Pre Four (m/s)	Pre Five (m/s)	All Pre	Means of Pre		Mid One (m/s)	Mid Two (m/s)	Mid Three (m/s)	Mid Four (m/s)	Mid Five (m/s)	All Mid	Means of Mid		Full One (m/s)	Full Two (m/s)	Full Three (m/s)	All Full	Means of Full
2.31	2.22	2.95	2.29	2.56	2.31	2.40539		1.46	1.41	1.47	1.76	1.51	1.46	1.72621		1.65	1.79	1.55	1.65	1.59907
2.29	2.18	2.55	2.27	2.34	2.29	2.34267		1.54	1.48	1.45	1.57	1.44	1.54	1.60514		1.65	1.64	1.46	1.65	1.53047
2.54	2.07	2.24	2.3	2.3	2.54	2.32347		1.55	1.53	1.51	1.63	1.49	1.55	1.56562		1.66	1.64	1.45	1.66	1.48383
2.18	1.94	2.2	2.09	2.07	2.18	2.44071		1.48	1.46	1.46	1.49	1.5	1.48	1.74583		1.83	1.61	1.38	1.83
2.44	2.23	2.64	2.26	2.44	2.44	2.26671		1.54	1.4	1.45	2.05	1.52	1.54	1.62688		1.65	1.7	1.54	1.65
2.35	2.21	2.36	2.27	2.33	2.35			1.55	1.48	1.46	1.6	1.47	1.55			1.63	1.6	1.47	1.63
2.66	2.17	2.24	2.35	2.31	2.66			1.55	1.54	1.51	1.62	1.53	1.55			1.58	1.59	1.38	1.58
2.21	1.9	2.21	2.13	2.1	2.21			1.45	1.45	1.44	1.45	1.52	1.45			1.72	1.58	1.38	1.72
2.46	2.23	2.49	2.24	2.39	2.46			1.65	1.44	1.49	2.04	1.58	1.65			1.63	1.7	1.53	1.63
2.37	2.24	2.34	2.28	2.38	2.37			1.57	1.53	1.5	1.61	1.52	1.57			1.5	1.55	1.49	1.5
2.58	2.24	2.26	2.38	2.34	2.58			1.55	1.55	1.53	1.58	1.57	1.55			1.47	1.52	1.36	1.47
2.26	1.96	2.23	2.16	2.19	2.26			1.44	1.42	1.42	1.42	1.57	1.44			1.65	1.52	1.42	1.65
2.47	2.24	2.42	2.26	2.34	2.47			2.06	1.46	1.54	2.05	1.68	2.06			1.57	1.71	1.57	1.57
2.37	2.3	2.37	2.29	2.41	2.37			1.61	1.56	1.53	1.6	1.59	1.61			1.47	1.51	1.53	1.47
2.48	2.29	2.3	2.4	2.36	2.48			1.58	1.58	1.57	1.59	1.61	1.58			1.41	1.46	1.44	1.41
2.25	1.96	2.24	2.28	2.31	2.25			1.47	1.48	1.45	1.46	1.62	1.47			1.57	1.49	1.53	1.57
2.48	2.32	2.4	2.33	2.2	2.48			2.29	1.49	1.58	1.78	1.8	2.29			1.55	1.59	1.59	1.55
2.43	2.33	2.37	2.33	2.42	2.43			1.62	1.56	1.55	1.58	1.63	1.62			1.44	1.49	1.56	1.44
2.54	2.34	2.29	2.43	2.4	2.54			1.57	1.58	1.57	1.56	1.65	1.57			1.44	1.46	1.5	1.44
2.31	2.05	2.28	2.31	2.33	2.31			1.4	1.43	1.43	1.46	1.58	1.4			1.56	1.48	1.6	1.56
2.45	2.69	2.41	2.43	2.11	2.45			2.2	1.51	1.64	1.69	1.87	2.2			1.58	1.51	1.56	1.58
2.53	2.37	2.37	2.38	2.44	2.53			1.66	1.56	1.55	1.57	1.62	1.66			1.47	1.47	1.56	1.47
2.61	2.41	2.3	2.41	2.4	2.61			1.58	1.56	1.56	1.51	1.63	1.58			1.48	1.46	1.51	1.48
2.33	2.13	2.31	2.32	2.32	2.33			1.39	1.42	1.39	1.45	1.48	1.39			1.41	1.4	1.61	1.41
2.4	2.98	2.33	2.58	2.07	2.4			2.52	1.55	1.68	1.72	1.89	2.52			1.57	1.48	1.57	1.57
2.61	2.43	2.36	2.44	2.41	2.61			1.79	1.56	1.57	1.56	1.62	1.79			1.43	1.48	1.57	1.43
2.65	2.47	2.29	2.39	2.38	2.65			1.62	1.56	1.59	1.52	1.63	1.62			1.46	1.42	1.49	1.46
2.35	2.22	2.33	2.37	2.24	2.35			1.38	1.45	1.45	1.46	1.48	1.38			1.35	1.32	1.63	1.35
2.46	2.82	2.18	2.68	2.14	2.46			3.06	1.58	1.64	2.27	1.88	3.06			1.55	1.49	1.59	1.55
2.67	2.45	2.35	2.49	2.39	2.67			1.78	1.58	1.6	1.76	1.6	1.78			1.45	1.49	1.52	1.45
2.72	2.48	2.3	2.38	2.39	2.72			1.64	1.56	1.62	1.59	1.6	1.64			1.44	1.41	1.48	1.44
2.45	2.19	2.32	2.31	2.3	2.45			1.45	1.49	1.47	1.51	1.42	1.45			1.36	1.31	1.63	1.36
2.56	2.52	2.05	2.65	2.18	2.56			3.65	1.6	1.57	2.56	1.85	3.65			1.52	2.48	1.57	1.52
2.69	2.45	2.3	2.52	2.39	2.69			2.01	1.56	1.6	1.8	1.58	2.01			1.47	1.69	1.46	1.47
2.75	2.45	2.3	2.39	2.39	2.75			1.73	1.57	1.67	1.6	1.6	1.73			1.44	1.42	1.45	1.44
2.41	2.13	2.33	2.35	2.3	2.41			1.5	1.5	1.5	1.54	1.49	1.5			1.41	1.34	1.57	1.41
2.65	2.5	1.97	2.58	2.22	2.65			3.55	1.61	1.55	2.85	1.84	3.55			1.47	3.03	1.53	1.47
2.66	2.47	2.29	2.53	2.38	2.66			1.81	1.58	1.62	1.85	1.58	1.81			1.49	1.69	1.42	1.49
2.66	2.48	2.36	2.39	2.4	2.66			1.82	1.56	1.73	1.65	1.59	1.82			1.46	1.42	1.41	1.46
2.52	2.25	2.32	2.37	2.39	2.52			1.6	1.5	1.55	1.52	1.47	1.6			1.43	1.37	1.48	1.43
2.59	2.54	2.17	2.59	2.26	2.59			3.22	1.73	1.54	2.79	1.86	3.22			1.46	3.25	1.52	1.46
2.47	2.49	2.3	2.55	2.36	2.47			1.8	1.62	1.68	1.7	1.63	1.8			1.51	1.51	1.42	1.51
2.47	2.48	2.4	2.41	2.43	2.47			1.84	1.59	1.79	1.65	1.62	1.84			1.46	1.4	1.4	1.46
2.15	2.2	2.22	2.37	2.34	2.15			1.67	1.52	1.64	1.51	1.51	1.67			1.43	1.32	1.4	1.43
2.49	2.56	2.32	2.58	2.17	2.49			2.88	1.99	1.55	2.37	1.84	2.88			1.5	3.8	1.55	1.5
2.36	2.49	2.34	2.5	2.33	2.36			1.79	1.65	1.68	1.63	1.65	1.79			1.55	1.45	1.44	1.55
2.35	2.47	2.42	2.41	2.45	2.35			1.77	1.6	1.8	1.64	1.65	1.77			1.47	1.4	1.44	1.47
2.22	2.19	2.18	2.32	2.44	2.22			1.71	1.53	1.64	1.47	1.53	1.71			1.41	1.34	1.31	1.41
2.54	2.55	2.45	2.53	2.04	2.54			2.65	2.12	1.55	2.22	1.8	2.65			1.54	2.42	1.55	1.54
2.31	2.44	2.35	2.46	2.29	2.31			1.91	1.65	1.66	1.64	1.66	1.91			1.57	1.4	1.45	1.57
2.31	2.45	2.4	2.4	2.44	2.31			1.66	1.61	1.73	1.69	1.61	1.66			1.48	1.41	1.45	1.48
2.12	2.26	2.29	2.35	2.34	2.12			1.67	1.53	1.56	1.51	1.54	1.67			1.4	1.32	1.31	1.4
2.61	2.59	2.46	2.5	1.94	2.61			2.55	2.18	1.56	2.14	1.74	2.55			1.56	1.53	1.54	1.56
2.32	2.41	2.34	2.43	2.24	2.32			1.85	1.65	1.67	1.66	1.62	1.85			1.54	1.4	1.44	1.54
2.3	2.43	2.38	2.39	2.39	2.3			1.58	1.63	1.66	1.67	1.6	1.58			1.51	1.43	1.47	1.51
2.14	2.18	2.31	2.22	2.36	2.14			1.58	1.55	1.52	1.4	1.58	1.58			1.45	1.37	1.22	1.45
2.66	2.62	2.45	2.56	1.93	2.66			2.46	2.2	1.57	2.09	1.65	2.46			1.57	1.43	1.54	1.57
2.31	2.37	2.33	2.41	2.22	2.31			1.68	1.68	1.65	1.65	1.62	1.68			1.53	1.4	1.44	1.53
2.3	2.38	2.35	2.39	2.29	2.3			1.52	1.65	1.6	1.63	1.63	1.52			1.55	1.4	1.48	1.55
2.14	2.15	2.24	2.12	2.2	2.14			1.48	1.61	1.41	1.31	1.62	1.48			1.43	1.37	1.32	1.43
2.45		2.46	2.71	1.98	2.45			2.32	2.09	1.61	1.99	1.58	2.32			1.59	1.41		1.59
2.3		2.32	2.42	2.2	2.3			1.7	1.71	1.63	1.65	1.59	1.7			1.55	1.4		1.55
2.3		2.33	2.39	2.17	2.3			1.54	1.64	1.58	1.63	1.56	1.54			1.54	1.39		1.54
2.1		2.17	2.29	2.04	2.1			1.47	1.57	1.46	1.46	1.55	1.47			1.37	1.38		1.37
2.57		2.4	2.78	2.1	2.57			2.31	1.91		1.94	1.56	2.31			1.57	1.43		1.57
2.28		2.31	2.46	2.21	2.28			1.62	1.68		1.66	1.58	1.62			1.6	1.4		1.6
2.27		2.31	2.41	2.11	2.27			1.51	1.65		1.61	1.55	1.51			1.58	1.38		1.58
2.13		2.13	2.26	1.99	2.13			1.46	1.54		1.45	1.48	1.46			1.45	1.38		1.45
2.52		2.29	2.94	2.22	2.52			2.03	1.83		1.93	1.63	2.03			1.55	1.44		1.55
2.25		2.27	2.5	2.24	2.25			1.62	1.7		1.65	1.61	1.62			1.58	1.42		1.58
2.25		2.31	2.44	2.09	2.25			1.52	1.67		1.59	1.55	1.52			1.65	1.39		1.65
2.07		2.14	2.16	2.04	2.07			1.47	1.6		1.59	1.46	1.47			1.51	1.42		1.51
2.54			3.27	2.39	2.54			1.8			1.98	1.73	1.8			1.55	1.44		1.55
2.24			2.6	2.2	2.24			1.59			1.65	1.63	1.59			1.59	1.42		1.59
2.22			2.44	2.06	2.22			1.54			1.61	1.55	1.54			1.63	1.37		1.63
2.05			2.3	2.01	2.05			1.44			1.7	1.5	1.44			1.55	1.43		1.55
			3.5		2.22			1.57			2.04	1.81	1.57			1.56	1.44		1.56
			2.52		2.18			1.55			1.69	1.56	1.55			1.63	1.44		1.63
			2.4		2.07			1.55			1.73	1.55	1.55			1.68	1.37		1.68
			2.25		1.94			1.45			1.71	1.47	1.45			1.62	1.44		1.62
			3.55		2.23			1.49			2.01	1.84	1.49			1.61	1.45		1.61
			2.62		2.21			1.55			1.74	1.59	1.55			1.64	1.44		1.64
			2.39		2.17			1.53			1.79	1.58	1.53			1.68	1.41		1.68
			2.32		1.9			1.43			1.71	1.56	1.43			1.66	1.44		1.66
					2.23			1.52			2.13	1.82	1.52			1.67	1.46		1.67
					2.24			1.55			1.75	1.6	1.55			1.61	1.46		1.61
					2.24			1.54			1.83	1.64	1.54			1.67	1.46		1.67
					1.96			1.4			1.67	1.61	1.4			1.67	1.44		1.67
					2.24			1.57			2.18	1.73	1.57			1.86	1.51		1.86
					2.3			1.54			1.77	1.59	1.54			1.63	1.48		1.63
					2.29			1.51			1.91	1.65	1.51			1.73	1.45		1.73
					1.96			1.44			1.67	1.59	1.44			1.68	1.41		1.68
					2.32			1.62			2.23	1.66	1.62			1.99	1.55		1.99
					2.33			1.53			1.81	1.59	1.53			1.67	1.5		1.67
					2.34			1.49			2.08	1.65	1.49			1.86	1.45		1.86
					2.05			1.42			1.81	1.61	1.42			1.76	1.4		1.76
					2.69			1.71				1.82	1.71			1.95	1.6		1.95
					2.37			1.52				1.64	1.52			1.72	1.49		1.72
					2.41			1.5				1.67	1.5			1.92	1.46		1.92
					2.13			1.37				1.5	1.37			1.73	1.41		1.73
					2.98			1.8				2.19	1.8			1.92	1.62		1.92
					2.43			1.56				1.66	1.56			1.81	1.49		1.81
					2.47			1.51				1.69	1.51			1.94	1.45		1.94
					2.22			1.36				1.47	1.36			1.67	1.43		1.67
					2.82			1.94				2.34	1.94			1.81	1.59		1.81
					2.45			1.6				1.62	1.6			2.52	1.46		2.52
					2.48			1.54				1.65	1.54			2.31	1.42		2.31
					2.19			1.4				1.46	1.4			1.87	1.43		1.87
					2.52			2.08				1.88	2.08				1.58		1.79
					2.45			1.59				1.62	1.59				1.47		1.64
					2.45			1.52				1.64	1.52				1.41		1.64
					2.13			1.36				1.49	1.36				1.39		1.61
					2.5			2.13					2.13				1.58		1.7
					2.47			1.65					1.65				1.5		1.6
					2.48			1.56					1.56				1.44		1.59
					2.25			1.41					1.41				1.39		1.58
					2.54								1.41				1.57		1.7
					2.49								1.48				1.54		1.55
					2.48								1.53				1.45		1.52
					2.2								1.46				1.42		1.52
					2.56								1.4				1.56		1.71
					2.49								1.48				1.54		1.51
					2.47								1.54				1.45		1.46
					2.19								1.45				1.41		1.49
					2.55								1.44				1.57		1.59
					2.44								1.53				1.62		1.49
					2.45								1.55				1.49		1.46
					2.26								1.42				1.51		1.48
					2.59								1.46						1.51
					2.41								1.56						1.47
					2.43								1.58						1.46
					2.18								1.48						1.4
					2.62								1.49						1.48
					2.37								1.56						1.48
					2.38								1.58						1.42
					2.15								1.43						1.32
					2.95								1.51						1.49
					2.55								1.56						1.49
					2.24								1.56						1.41
					2.2								1.42						1.31
					2.64								1.55						2.48
					2.36								1.56						1.69
					2.24								1.56						1.42
					2.21								1.45						1.34
					2.49								1.58						3.03
					2.34								1.58						1.69
					2.26								1.56						1.42
					2.23								1.49						1.37
					2.42								1.6						3.25
					2.37								1.56						1.51
					2.3								1.57						1.4
					2.24								1.5						1.32
					2.4								1.61						3.8
					2.37								1.58						1.45
					2.29								1.56						1.4
					2.28								1.5						1.34
					2.41								1.73						2.42
					2.37								1.62						1.4
					2.3								1.59						1.41
					2.31								1.52						1.32
					2.33								1.99						1.53
					2.36								1.65						1.4
					2.29								1.6						1.43
					2.33								1.53						1.37
					2.18								2.12						1.43
					2.35								1.65						1.4
					2.3								1.61						1.4
					2.32								1.53						1.37
					2.05								2.18						1.41
					2.3								1.65						1.4
					2.3								1.63						1.39
					2.33								1.55						1.38
					1.97								2.2						1.43
					2.29								1.68						1.4
					2.36								1.65						1.38
					2.32								1.61						1.38
					2.17								2.09						1.44
					2.3								1.71						1.42
					2.4								1.64						1.39
					2.22								1.57						1.42
					2.32								1.91						1.44
					2.34								1.68						1.42
					2.42								1.65						1.37
					2.18								1.54						1.43
					2.45								1.83						1.44
					2.35								1.7						1.44
					2.4								1.67						1.37
					2.29								1.6						1.44
					2.46								1.47						1.45
					2.34								1.45						1.44
					2.38								1.51						1.41
					2.31								1.46						1.44
					2.45								1.45						1.46
					2.33								1.46						1.46
					2.35								1.51						1.46
					2.24								1.44						1.44
					2.46								1.49						1.51
					2.32								1.5						1.48
					2.33								1.53						1.45
					2.17								1.42						1.41
					2.4								1.54						1.55
					2.31								1.53						1.5
					2.31								1.57						1.45
					2.13								1.45						1.4
					2.29								1.58						1.6
					2.27								1.55						1.49
					2.31								1.57						1.46
					2.14								1.43						1.41
					2.29								1.64						1.62
					2.27								1.55						1.49
					2.3								1.56						1.45
					2.09								1.39						1.43
					2.26								1.68						1.59
					2.27								1.57						1.46
					2.35								1.59						1.42
					2.13								1.45						1.43
					2.24								1.64						1.58
					2.28								1.6						1.47
					2.38								1.62						1.41
					2.16								1.47						1.39
					2.26								1.57						1.58
					2.29								1.6						1.5
					2.4								1.67						1.44
					2.28								1.5						1.39
					2.33								1.55						1.57
					2.33								1.62						1.54
					2.43								1.73						1.45
					2.31								1.55						1.42
					2.43								1.54						1.56
					2.38								1.68						1.54
					2.41								1.79						1.45
					2.32								1.64						1.41
					2.58								1.55						1.57
					2.44								1.68						1.62
					2.39								1.8						1.49
					2.37								1.64						1.51
					2.68								1.55						1.55
					2.49								1.66						1.46
					2.38								1.73						1.45
					2.31								1.56						1.38
					2.65								1.56						1.54
					2.52								1.67						1.47
					2.39								1.66						1.38
					2.35								1.52						1.38
					2.58								1.57						1.53
					2.53								1.65						1.49
					2.39								1.6						1.36
					2.37								1.41						1.42
					2.59								1.61						1.57
					2.55								1.63						1.53
					2.41								1.58						1.44
					2.37								1.46						1.53
					2.58								1.76						1.59
					2.5								1.57						1.56
					2.41								1.63						1.5
					2.32								1.49						1.6
					2.53								2.05						1.56
					2.46								1.6						1.56
					2.4								1.62						1.51
					2.35								1.45						1.61
					2.5								2.04						1.57
					2.43								1.61						1.57
					2.39								1.58						1.49
					2.22								1.42						1.63
					2.56								2.05						1.59
					2.41								1.6						1.52
					2.39								1.59						1.48
					2.12								1.46						1.63
					2.71								1.78						1.57
					2.42								1.58						1.46
					2.39								1.56						1.45
					2.29								1.46						1.57
					2.78								1.69						1.53
					2.46								1.57						1.42
					2.41								1.51						1.41
					2.26								1.45						1.48
					2.94								1.72						1.52
					2.5								1.56						1.42
					2.44								1.52						1.4
					2.16								1.46						1.4
					3.27								2.27						1.55
					2.6								1.76						1.44
					2.44								1.59						1.44
					2.3								1.51						1.31
					3.5								2.56						1.55
					2.52								1.8						1.45
					2.4								1.6						1.45
					2.25								1.54						1.31
					3.55								2.85						1.54
					2.62								1.85						1.44
					2.39								1.65						1.47
					2.32								1.52						1.22
					2.56								2.79						1.54
					2.34								1.7						1.44
					2.3								1.65						1.48
					2.07								1.51						1.32
					2.44								2.37
					2.33								1.63
					2.31								1.64
					2.1								1.47
					2.39								2.22
					2.38								1.64
					2.34								1.69
					2.19								1.51
					2.34								2.14
					2.41								1.66
					2.36								1.67
					2.31								1.4
					2.2								2.09
					2.42								1.65
					2.4								1.63
					2.33								1.31
					2.11								1.99
					2.44								1.65
					2.4								1.63
					2.32								1.46
					2.07								1.94
					2.41								1.66
					2.38								1.61
					2.24								1.45
					2.14								1.93
					2.39								1.65
					2.39								1.59
					2.3								1.59
					2.18								1.98
					2.39								1.65
					2.39								1.61
					2.3								1.7
					2.22								2.04
					2.38								1.69
					2.4								1.73
					2.39								1.71
					2.26								2.01
					2.36								1.74
					2.43								1.79
					2.34								1.71
					2.17								2.13
					2.33								1.75
					2.45								1.83
					2.44								1.67
					2.04								2.18
					2.29								1.77
					2.44								1.91
					2.34								1.67
					1.94								2.23
					2.24								1.81
					2.39								2.08
					2.36								1.81
					1.93								1.51
					2.22								1.44
					2.29								1.49
					2.2								1.5
					1.98								1.52
					2.2								1.47
					2.17								1.53
					2.04								1.52
					2.1								1.58
					2.21								1.52
					2.11								1.57
					1.99								1.57
					2.22								1.68
					2.24								1.59
					2.09								1.61
					2.04								1.62
					2.39								1.8
					2.2								1.63
					2.06								1.65
					2.01								1.58
													1.87
													1.62
													1.63
													1.48
													1.89
													1.62
													1.63
													1.48
													1.88
													1.6
													1.6
													1.42
													1.85
													1.58
													1.6
													1.49
													1.84
													1.58
													1.59
													1.47
													1.86
													1.63
													1.62
													1.51
													1.84
													1.65
													1.65
													1.53
													1.8
													1.66
													1.61
													1.54
													1.74
													1.62
													1.6
													1.58
													1.65
													1.62
													1.63
													1.62
													1.58
													1.59
													1.56
													1.55
													1.56
													1.58
													1.55
													1.48
													1.63
													1.61
													1.55
													1.46
													1.73
													1.63
													1.55
													1.5
													1.81
													1.56
													1.55
													1.47
													1.84
													1.59
													1.58
													1.56
													1.82
													1.6
													1.64
													1.61
													1.73
													1.59
													1.65
													1.59
													1.66
													1.59
													1.65
													1.61
													1.82
													1.64
													1.67
													1.5
													2.19
													1.66
													1.69
													1.47
													2.34
													1.62
													1.65
													1.46
													1.88
													1.62
													1.64
													1.49

## Sheet: (3) Case B
Pre One (m/s)	Pre Two (m/s)	Pre Three (m/s)	Pre Four (m/s)	Pre Five (m/s)	All Pre	Means of Pre		Mid One (m/s)	Mid Two (m/s)	Mid Three (m/s)	Mid Four (m/s)	All Mid	Means of Mid		Full One (m/s)	Full Two (m/s)	Full Three (m/s)	Full Four (m/s)	Full Five (m/s)	All Full	Means of Full
1.96	1.83	2.34	2.04	1.99	1.96	2.1155		1.93	1.71	2.09	1.58	1.93	2.06793		1.75	2.16	2.26	1.79	1.69	1.75	1.67145
1.94	1.98	2.18	2.21	2.04	1.94	2.1124		2.08	1.87	2.04	1.82	2.08	2.18635		1.69	1.95	2.15	1.77	1.52	1.69	1.70307
2.01	2.03	2.33	2.37	1.94	2.01	2.17848		2.47	1.94	2.14	1.93	2.47	2.074		1.66	1.96	2.23	1.81	1.5	1.66	1.70207
1.93	1.99	2.21	2.17	1.86	1.93	2		2.35	1.79	2.08	1.75	2.35	2.027		1.59	1.91	1.95	1.69	1.45	1.59	1.70779
1.93	1.8	2	1.74	2.3	1.93	2.07125		1.91	2.23	1.91	1.51	1.91			1.48	1.9	1.71	1.4	1.19	1.48	1.75455
1.92	1.84	2.46	2	2.03	1.92			1.9	1.75	2.09	1.61	1.9			1.74	2.13	2.08	1.74	1.67	1.74
1.95	2.01	2.19	2.06	2.11	1.95			2.01	1.8	2.05	1.78	2.01			1.68	1.94	2.11	1.7	1.51	1.68
2.04	2.06	2.33	2.19	1.99	2.04			2.43	1.92	2.12	1.95	2.43			1.63	1.93	2.19	1.71	1.49	1.63
1.95	1.94	2.2	2.03	1.9	1.95			2.55	1.88	2.02	1.84	2.55			1.56	1.83	1.92	1.58	1.41	1.56
1.89	1.72	2	1.61	2.35	1.89			2.05	2.19	1.86	1.5	2.05			1.49	1.58	1.81	1.36	1.2	1.49
1.93	1.86	2.49	1.96	2.15	1.93			1.89	1.8	2.15	1.68	1.89			1.76	2.11	2.08	1.74	3.09	1.76
1.97	1.98	2.2	2.02	2.11	1.97			2.02	1.86	2.06	1.86	2.02			1.69	1.92	2.07	1.68	1.69	1.69
2.1	2.11	2.3	2.16	2.01	2.1			2.47	1.93	2.07	1.98	2.47			1.63	1.92	2.09	1.68	1.63	1.63
1.99	2.03	2.17	2.04	1.93	1.99			2.37	1.86	1.92	1.81	2.37			1.56	1.86	1.89	1.58	1.6	1.56
1.84	1.8	2.02	1.62	2.22	1.84			2.11	2.61	1.76	1.55	2.11			1.52	1.52	1.74	1.26	1.2	1.52
1.92	1.91	2.42	1.88	2.27	1.92			1.85	1.86	2.23	1.75	1.85			1.78	2.01	2.02	1.73	3.39	1.78
2	2.07	2.2	1.98	2.12	2			1.99	1.85	2.07	1.86	1.99			1.7	1.85	2.01	1.66	1.62	1.7
2.13	2.12	2.26	2.1	2.02	2.13			2.46	1.92	2.02	2.01	2.46			1.62	1.88	1.97	1.65	1.6	1.62
2	1.98	2.16	1.95	1.94	2			2.36	1.9	1.86	1.82	2.36			1.58	1.79	1.78	1.54	1.58	1.58
1.79	1.74	2.02	1.61	1.84	1.79			1.98	2.1	1.65	1.53	1.98			1.5	1.52	1.67	1.4	1.85	1.5
1.95	1.96	2.46	1.81	2.35	1.95			1.83	2.26	2.28	1.85	1.83			1.78	1.9	1.98	1.74	3.41	1.78
2.01	2.06	2.16	2	2.11	2.01			1.95	1.94	2.12	1.94	1.95			1.69	1.79	1.91	1.64	1.6	1.69
2.19	2.14	2.2	2.04	1.99	2.19			2.38	1.84	2.01	2.01	2.38			1.57	1.83	1.84	1.59	1.6	1.57
2.06	2.05	2.12	1.79	1.89	2.06			2.39	1.79	1.92	1.67	2.39			1.57	1.71	1.7	1.49	1.6	1.57
1.8	1.77	2.05	1.49	1.58	1.8			1.83	1.57	1.66	1.49	1.83			1.48	1.52	1.6	1.42	1.86	1.48
1.98	2.04	2.48	1.8	2.29	1.98			1.84	2.29	2.27	1.92	1.84			1.68	1.78	1.9	1.81	2.39	1.68
2.04	2.01	2.13	1.92	2.1	2.04			1.97	2.07	2.09	1.93	1.97			1.54	1.74	1.82	1.64	1.6	1.54
2.24	2.15	2.1	2	1.99	2.24			2.34	1.88	2.02	2.03	2.34			1.59	1.81	1.71	1.55	1.63	1.59
2.07	2.1	2.05	1.88	1.93	2.07			2.22	1.84	1.83	1.82	2.22			1.51	1.71	1.63	1.46	1.65	1.51
1.93	1.85	2.06	1.49	1.58	1.93			1.8	1.62	1.61	1.52	1.8			1.45	1.55	1.5	1.52	1.73	1.45
2.01	1.99	2.41	1.82	2.23	2.01			1.83	2.29	2.27	1.92	1.83			1.69	1.75	1.85	1.87	1.9	1.69
2.03	2.11	2.08	1.9	2.06	2.03			2.01	2.04	2.08	1.91	2.01			1.58	1.74	1.76	1.67	1.59	1.58
2.25	2.15	2.04	1.95	1.96	2.25			2.21	1.92	2.04	2.04	2.21			1.58	1.79	1.65	1.58	1.6	1.58
2.14	2	2.06	1.88	1.88	2.14			2.2	1.83	1.82	1.9	2.2			1.53	1.71	1.62	1.48	1.65	1.53
2	1.83	2.07	1.55	1.53	2			1.86	1.6	1.63	1.52	1.86			1.47	1.6	1.52	1.6	1.81	1.47
2.01	1.98	2.11	1.81	2.27	2.01			1.96	2.3	2.25	1.86	1.96			1.7	1.76	1.78	1.93	1.86	1.7
2.08	2.05	2.07	1.85	2.08	2.08			2.21	2.12	2.15	1.95	2.21			1.58	1.71	1.72	1.75	1.61	1.58
2.26	2.15	2.05	1.89	1.96	2.26			2.19	1.98	2.05	2.07	2.19			1.59	1.75	1.64	1.6	1.59	1.59
2.16	2.06	2.11	1.78	1.87	2.16			2.09	1.87	1.88	1.89	2.09			1.54	1.68	1.61	1.52	1.63	1.54
2.06	1.94	2.13	1.82	1.54	2.06			1.82	1.69	1.69	1.5	1.82			1.5	1.63	1.64	1.89	1.83	1.5
2.01	1.91	2.08	1.98	2.51	2.01			2.17	2.44	2.26	1.85	2.17			1.68	1.79	1.7	1.96	1.84	1.68
2.08	1.99	2.12	2.01	2.22	2.08			2.48	2.16	2.09	1.97	2.48			1.57	1.67	1.68	1.72	1.62	1.57
2.24	2.1	2.06	2	1.98	2.24			2.19	2.04	2.05	2.1	2.19			1.55	1.67	1.64	1.6	1.61	1.55
2.14	2.07	2.14	2.02	1.89	2.14			2.07	1.93	1.83	1.97	2.07			1.53	1.61	1.6	1.49	1.66	1.53
2.18	1.96	2.27	3.32	1.6	2.18			1.82	1.8	1.72	1.55	1.82			1.5	1.58	1.7	1.72	1.86	1.5
1.99	1.86	2.09	2.07	2.72	1.99			2.55	2.51	2.22	1.91	2.55			1.67	1.78	1.62	1.98	1.86	1.67
2.07	1.97	2.09	2.08	2.26	2.07			2.62	2.2	2.11	2.01	2.62			1.54	1.66	1.65	1.74	1.65	1.54
2.22	2.1	2.12	2.03	2	2.22			2.19	2.03	2.03	2.12	2.19			1.55	1.62	1.64	1.6	1.65	1.55
2.18	2.06	2.2	2.22	1.88	2.18			2.06	1.95	1.94	2.04	2.06			1.51	1.56	1.6	1.5	1.68	1.51
2.55	1.94	2.35	3.37	1.65	2.55			1.86	1.82	1.81	1.69	1.86			1.52	1.52	1.71	1.32	1.82	1.52
2.01	1.85	2.06	2.18	3.16	2.01			2.75	2.45	2.14	1.98	2.75			1.67	1.76	1.6	1.97	1.88	1.67
2.09	1.96	2.1	2.12	2.4	2.09			2.55	2.12	2.08	2.1	2.55			1.56	1.63	1.64	1.8	1.67	1.56
2.24	2.1	2.16	2.04	1.97	2.24			2.14	2.05	2.02	2.11	2.14			1.56	1.6	1.64	1.62	1.65	1.56
2.25	2.07	2.23	2.08	1.86	2.25			2.01	1.91	1.93	2.02	2.01			1.54	1.53	1.61	1.58	1.7	1.54
2.61	1.94	2.36	2.69	1.73	2.61			1.94	2.18	1.7	1.83	1.94			1.58	1.44	1.72	1.4	1.68	1.58
2.05	1.97	2.1	2.21	3.6	2.05			2.94	2.5	2.06	2.01	2.94			1.64	1.73	1.56	1.82	1.83	1.64
2.08	1.98	2.12	2.08	2.54	2.08			2.45	2.16	2.05	2.12	2.45			1.56	1.62	1.61	1.7	1.65	1.56
2.26	2.11	2.21	2.04	1.97	2.26			2.07	2.05	2.02	2.11	2.07			1.6	1.56	1.6	1.6	1.65	1.6
2.29	2	2.28	2.04	1.87	2.29			1.97	2.08	1.92	2.05	1.97			1.56	1.5	1.58	1.55	1.67	1.56
2.56	1.95	2.42	2.47	1.83	2.56			2.05	2.58	1.7	1.95	2.05			1.69	1.38	1.71	1.42	1.57	1.69
2.09	2.15	2.03	2.33	3.26	2.09			2.92	2.61	2.06	2.02	2.92			1.62	1.73	1.55	1.66	1.81	1.62
2.06	1.96	2.18	2.01	2.26	2.06			2.4	2.17	2.1	2.08	2.4			1.57	1.6	1.56	1.61	1.68	1.57
2.22	2.11	2.23	2.01	1.96	2.22			2.05	2.05	2.06	2.09	2.05			1.59	1.55	1.55	1.55	1.7	1.59
2.28	2.03	2.35	1.96	1.89	2.28			1.93	2.24	2.02	2.08	1.93			1.55	1.47	1.53	1.52	1.69	1.55
2.48	1.91	2.51	1.87	1.89	2.48			2.13	4.08	2.11	2.06	2.13			1.8	1.32	1.57	1.44	1.59	1.8
2.11	2.36	2.04	2.74	2.63	2.11			2.61	2.57	2.13	2.25	2.61			1.62	1.76	1.56	1.57	1.83	1.62
2.04	1.98	2.21	2.14	2.14	2.04			2.23	2.12	2.12	2.09	2.23			1.6	1.65	1.57	1.59	1.71	1.6
2.25	2.11	2.21	1.98	1.97	2.25			2.05	2.08	2.05	2.06	2.05			1.6	1.57	1.55	1.56	1.74	1.6
2.24	1.98	2.35	1.92	1.93	2.24			1.93	2.61	2.02	2.07	1.93			1.57	1.54	1.54	1.54	1.74	1.57
2.46	1.95	2.53	1.61	1.91	2.46			2.08	4.42	2.2	2.18	2.08			1.72	1.38	1.49	1.46	1.62	1.72
2.07	2.54	2.08	2.55	2.28	2.07			2.41	2.54	2.21	3.12	2.41			1.65	1.99	1.62	1.53	1.91	1.65
2.04	2	2.23	2.04	2.09	2.04			2.15	2.16	2.11	2.22	2.15			1.65	1.76	1.6	1.58	1.71	1.65
2.18	2.12	2.2	1.96	1.94	2.18			2.06	2.15	2.02	2.03	2.06			1.64	1.64	1.57	1.6	1.74	1.64
2.23	2.04	2.31	1.81	1.92	2.23			1.95	2.93	2.03	2.07	1.95			1.61	1.7	1.56	1.57	1.74	1.61
2.3	2.05	2.5	1.55	1.88	2.3			2.06	4.02	2.58	1.97	2.06			1.81	1.5	1.49	1.48	1.6	1.81
2.06	2.63	2.4	2.29	2.08	2.06			2.08	2.66	2.4	3.7	2.08			1.67	2.21	1.67	1.51	1.91	1.67
2.13	2.24	2.13	1.95	1.97	2.13			2.11	2.22	2.07	2.16	2.11			1.67	1.91	1.63	1.58	1.71	1.67
2.18	2.19	2.12	1.93	1.95	2.18			2.05	2.27	1.97	2.02	2.05			1.65	1.68	1.59	1.6	1.74	1.65
2.11	2.18	2.13	1.7	1.94	2.11			2.02	3.17	1.98	2.08	2.02			1.63	1.69	1.54	1.59	1.75	1.63
2.16	2.15	2.11	1.54	1.86	2.16			2.14	3.39	2.33	1.92	2.14			1.75	1.63	1.47	1.52	1.69	1.75
2.08	2.97	2.4	1.88		2.08			1.79	2.67	2.62	2.89	1.79			1.72	2.05	1.73	1.52	1.92	1.72
2.17	2.36	2.1	1.91		2.17			2.02	2.14	2.14	2.04	2.02			1.68	1.97	1.67	1.58	1.74	1.68
2.14	2.2	2.07	1.88		2.14			2.03	2.29	2	2.04	2.03			1.65	1.72	1.6	1.61	1.74	1.65
2.04	2.17	2.07	1.69		2.04			2.05	2.88	2.03	2.13	2.05			1.64	1.69	1.57	1.59	1.77	1.64
2.1	2.15	2.06	1.49		2.1			2.11	3.15	2.28	2.07	2.11			1.9	1.68	1.51	1.58	1.77	1.9
2.16	3.22	2.41			2.16			1.5	2.69	2.72	1.97	1.5			1.77	1.8	1.7	1.6	1.92	1.77
2.23	2.53	2.06			2.23			1.95	2.09	2.11	1.94	1.95			1.73	1.94	1.7	1.6	1.73	1.73
2.12	2.22	2.05			2.12			1.99	2.13	2.06	2.04	1.99			1.66	1.77	1.63	1.65	1.74	1.66
2.05	2.18	2.05			2.05			2.14	2.2	2.05	2.24	2.14			1.69	1.71	1.59	1.63	1.75	1.69
2.11	2.15	2.03			2.11			2.13	2.2	2.06	2.21	2.13			2.1	1.69	1.58	1.64	1.8	2.1
2.32	3.22	2.47			2.32			1.49	2.56	2.73	1.92	1.49			1.93	1.68	1.64	1.9	1.8	1.93
2.2	2.57	2.06			2.2			1.92	2.03	2.08	1.94	1.92			1.76	1.9	1.72	1.66	1.73	1.76
2.11	2.17	2.05			2.11			1.96	2.12	2.11	2.03	1.96			1.65	1.77	1.67	1.69	1.73	1.65
2.06	2.15	2.02			2.06			2.28	2.14	2.06	2.22	2.28			1.72	1.7	1.64	1.67	1.74	1.72
2.21	2.13	2.04			2.21			2.06	2.01	1.94	2.26	2.06			2.33	1.67	1.68	1.88	1.88	2.33
2.41	3.66	2.61			2.41			1.57	2.29	2.85	2.39	1.57			2.03	1.78	1.58	2.62	1.72	2.03
2.21	2.54	2.03			2.21			1.92	1.94	2.09	2.11	1.92			1.77	1.92	1.66	1.71	1.72	1.77
2.12	2.14	2.06			2.12			1.96	2.06	2.15	2	1.96			1.72	1.75	1.67	1.68	1.76	1.72
2.1	2.1	2.02			2.1			2.31	2.17	2.09	2.4	2.31			1.78	1.64	1.61	1.66	1.74	1.78
2.3	2.13	1.98			2.3			1.96	1.89	1.9	2.76	1.96			2.43	1.63	1.7	1.98	1.85	2.43
2.01	3.31	2.76			2.01			1.86	2.18	2.84	2.31	1.86			2.1	1.92	1.54	3.15	1.55	2.1
2.05	2.2	2.13			2.05			1.92	1.89	2.07	2.18	1.92			1.84	1.91	1.6	1.74	1.77	1.84
2.18	2.11	2.05			2.18			1.96	2.04	2.19	1.99	1.96			1.91	1.7	1.66	1.67	1.86	1.91
2.27	2.05	2.02			2.27			2.18	2.31	2.08	2.25	2.18			1.93	1.54	1.61	1.65	1.86	1.93
2.45	2.23	2.06			2.45			2.06	1.84	1.89	2.9	2.06			1.65	1.43	1.7	1.86	2.21	1.65
1.94	2.62	2.7			1.94			1.98	2.05	2.48	2.15	1.98			2.09	1.94	1.57	2.71	1.5	2.09
2.08	2.12	2.1			2.08			1.93	1.87	2.04	2.05	1.93			1.9	1.89	1.59	1.79	1.83	1.9
2.2	2.08	2.08			2.2			2.04	2.07	2.21	2.02	2.04			2.08	1.68	1.66	1.68	1.87	2.08
2.29	2.02	2.03			2.29			2.26	2.54	2.15	2.26	2.26			1.97	1.53	1.62	1.65	1.9	1.97
2.37	2.27	2.05			2.37			1.83	1.87	2.01	2.62	1.83			0.95	1.33	1.68	1.94	2.27	0.95
1.91	2.16	2.6			1.91			1.92	2		2.06	1.92				1.94	1.68	2.16		2.16
2.07	2.01	2.13			2.07			1.93	1.86		2.05	1.93				1.86	1.56	1.8		1.95
2.18	2.02	2.07			2.18			2.05	2.15		2.02	2.05				1.63	1.62	1.68		1.96
2.26	2.01	2.06			2.26			2.15	2.52		2.08	2.15				1.51	1.59	1.64		1.91
2.23	2.28	1.83			2.23			1.85	1.66		2.45	1.85				1.28	1.61	2.38		1.9
1.93	1.84	2.56			1.93			1.88			2.09	1.88				1.87	1.87	2.1		2.13
2.06	1.94	2.16			2.06			1.92			2.06	1.92				1.72	1.59	1.82		1.94
2.16	2.01	2.05			2.16			2.03			2.05	2.03				1.52	1.6	1.65		1.93
2.2	1.99	2.03			2.2			2.03			2.04	2.03				1.49	1.59	1.61		1.83
2.14	2.25	1.82			2.14			2.82			2.39	2.82				1.34	1.56	2.24		1.58
1.99	1.71	2.5			1.99			1.87				1.87				1.81	2.05	2.11		2.11
2.03	1.95	2.15			2.03			1.88				1.88				1.77	1.66	1.78		1.92
2.15	1.98	2.06			2.15			2.01				2.01				1.56	1.64	1.64		1.92
2.18	2.02	2.03			2.18			1.97				1.97				1.5	1.63	1.61		1.86
2.07	2.15	1.81			2.07			1.78				1.78				1.41	1.55	2.05		1.52
2.05					2.05			1.87				1.87				1.76	2.17	2.11		2.01
2					2			1.86				1.86				1.73	1.71	1.81		1.85
2.13					2.13			1.98				1.98				1.55	1.74	1.68		1.88
2.17					2.17			1.89				1.89				1.5	1.66	1.65		1.79
2.08					2.08			1.76				1.76				1.41	1.55	1.64		1.52
2.06					2.06			1.89				1.89				1.77	2.14	2.13		1.9
2.01					2.01			1.85				1.85				1.73	1.75	1.8		1.79
2.15					2.15			1.94				1.94				1.57	1.78	1.7		1.83
2.15					2.15			1.82				1.82				1.51	1.71	1.75		1.71
2.05					2.05			1.75				1.75				1.43	1.56	1.73		1.52
2.08					2.08			2.06				2.06				1.84		2.14		1.78
1.96					1.96			1.89				1.89				1.75		1.86		1.74
2.12					2.12			1.93				1.93				1.64		1.71		1.81
2.15					2.15			1.71				1.71				1.57		1.61		1.71
2.12					2.12			1.71				1.71				1.51		1.48		1.55
					1.83							1.71						2.06		1.75
					1.98							1.87						1.86		1.74
					2.03							1.94						1.82		1.79
					1.99							1.79						1.69		1.71
					1.8							2.23						1.47		1.6
					1.84							1.75								1.76
					2.01							1.8								1.71
					2.06							1.92								1.75
					1.94							1.88								1.68
					1.72							2.19								1.63
					1.86							1.8								1.79
					1.98							1.86								1.67
					2.11							1.93								1.67
					2.03							1.86								1.61
					1.8							2.61								1.58
					1.91							1.86								1.78
					2.07							1.85								1.66
					2.12							1.92								1.62
					1.98							1.9								1.56
					1.74							2.1								1.52
					1.96							2.26								1.76
					2.06							1.94								1.63
					2.14							1.84								1.6
					2.05							1.79								1.53
					1.77							1.57								1.44
					2.04							2.29								1.73
					2.01							2.07								1.62
					2.15							1.88								1.56
					2.1							1.84								1.5
					1.85							1.62								1.38
					1.99							2.29								1.73
					2.11							2.04								1.6
					2.15							1.92								1.55
					2							1.83								1.47
					1.83							1.6								1.32
					1.98							2.3								1.76
					2.05							2.12								1.65
					2.15							1.98								1.57
					2.06							1.87								1.54
					1.94							1.69								1.38
					1.91							2.44								1.99
					1.99							2.16								1.76
					2.1							2.04								1.64
					2.07							1.93								1.7
					1.96							1.8								1.5
					1.86							2.51								2.21
					1.97							2.2								1.91
					2.1							2.03								1.68
					2.06							1.95								1.69
					1.94							1.82								1.63
					1.85							2.45								2.05
					1.96							2.12								1.97
					2.1							2.05								1.72
					2.07							1.91								1.69
					1.94							2.18								1.68
					1.97							2.5								1.8
					1.98							2.16								1.94
					2.11							2.05								1.77
					2							2.08								1.71
					1.95							2.58								1.69
					2.15							2.61								1.68
					1.96							2.17								1.9
					2.11							2.05								1.77
					2.03							2.24								1.7
					1.91							4.08								1.67
					2.36							2.57								1.78
					1.98							2.12								1.92
					2.11							2.08								1.75
					1.98							2.61								1.64
					1.95							4.42								1.63
					2.54							2.54								1.92
					2							2.16								1.91
					2.12							2.15								1.7
					2.04							2.93								1.54
					2.05							4.02								1.43
					2.63							2.66								1.94
					2.24							2.22								1.89
					2.19							2.27								1.68
					2.18							3.17								1.53
					2.15							3.39								1.33
					2.97							2.67								1.94
					2.36							2.14								1.86
					2.2							2.29								1.63
					2.17							2.88								1.51
					2.15							3.15								1.28
					3.22							2.69								1.87
					2.53							2.09								1.72
					2.22							2.13								1.52
					2.18							2.2								1.49
					2.15							2.2								1.34
					3.22							2.56								1.81
					2.57							2.03								1.77
					2.17							2.12								1.56
					2.15							2.14								1.5
					2.13							2.01								1.41
					3.66							2.29								1.76
					2.54							1.94								1.73
					2.14							2.06								1.55
					2.1							2.17								1.5
					2.13							1.89								1.41
					3.31							2.18								1.77
					2.2							1.89								1.73
					2.11							2.04								1.57
					2.05							2.31								1.51
					2.23							1.84								1.43
					2.62							2.05								1.84
					2.12							1.87								1.75
					2.08							2.07								1.64
					2.02							2.54								1.57
					2.27							1.87								1.51
					2.16							2								2.26
					2.01							1.86								2.15
					2.02							2.15								2.23
					2.01							2.52								1.95
					2.28							1.66								1.71
					1.84							2.09								2.08
					1.94							2.04								2.11
					2.01							2.14								2.19
					1.99							2.08								1.92
					2.25							1.91								1.81
					1.71							2.09								2.08
					1.95							2.05								2.07
					1.98							2.12								2.09
					2.02							2.02								1.89
					2.15							1.86								1.74
					2.34							2.15								2.02
					2.18							2.06								2.01
					2.33							2.07								1.97
					2.21							1.92								1.78
					2							1.76								1.67
					2.46							2.23								1.98
					2.19							2.07								1.91
					2.33							2.02								1.84
					2.2							1.86								1.7
					2							1.65								1.6
					2.49							2.28								1.9
					2.2							2.12								1.82
					2.3							2.01								1.71
					2.17							1.92								1.63
					2.02							1.66								1.5
					2.42							2.27								1.85
					2.2							2.09								1.76
					2.26							2.02								1.65
					2.16							1.83								1.62
					2.02							1.61								1.52
					2.46							2.27								1.78
					2.16							2.08								1.72
					2.2							2.04								1.64
					2.12							1.82								1.61
					2.05							1.63								1.64
					2.48							2.25								1.7
					2.13							2.15								1.68
					2.1							2.05								1.64
					2.05							1.88								1.6
					2.06							1.69								1.7
					2.41							2.26								1.62
					2.08							2.09								1.65
					2.04							2.05								1.64
					2.06							1.83								1.6
					2.07							1.72								1.71
					2.11							2.22								1.6
					2.07							2.11								1.64
					2.05							2.03								1.64
					2.11							1.94								1.61
					2.13							1.81								1.72
					2.08							2.14								1.56
					2.12							2.08								1.61
					2.06							2.02								1.6
					2.14							1.93								1.58
					2.27							1.7								1.71
					2.09							2.06								1.55
					2.09							2.05								1.56
					2.12							2.02								1.55
					2.2							1.92								1.53
					2.35							1.7								1.57
					2.06							2.06								1.56
					2.1							2.1								1.57
					2.16							2.06								1.55
					2.23							2.02								1.54
					2.36							2.11								1.49
					2.1							2.13								1.62
					2.12							2.12								1.6
					2.21							2.05								1.57
					2.28							2.02								1.56
					2.42							2.2								1.49
					2.03							2.21								1.67
					2.18							2.11								1.63
					2.23							2.02								1.59
					2.35							2.03								1.54
					2.51							2.58								1.47
					2.04							2.4								1.73
					2.21							2.07								1.67
					2.21							1.97								1.6
					2.35							1.98								1.57
					2.53							2.33								1.51
					2.08							2.62								1.7
					2.23							2.14								1.7
					2.2							2								1.63
					2.31							2.03								1.59
					2.5							2.28								1.58
					2.4							2.72								1.64
					2.13							2.11								1.72
					2.12							2.06								1.67
					2.13							2.05								1.64
					2.11							2.06								1.68
					2.4							2.73								1.58
					2.1							2.08								1.66
					2.07							2.11								1.67
					2.07							2.06								1.61
					2.06							1.94								1.7
					2.41							2.85								1.54
					2.06							2.09								1.6
					2.05							2.15								1.66
					2.05							2.09								1.61
					2.03							1.9								1.7
					2.47							2.84								1.57
					2.06							2.07								1.59
					2.05							2.19								1.66
					2.02							2.08								1.62
					2.04							1.89								1.68
					2.61							2.48								1.68
					2.03							2.04								1.56
					2.06							2.21								1.62
					2.02							2.15								1.59
					1.98							2.01								1.61
					2.76							1.58								1.87
					2.13							1.82								1.59
					2.05							1.93								1.6
					2.02							1.75								1.59
					2.06							1.51								1.56
					2.7							1.61								2.05
					2.1							1.78								1.66
					2.08							1.95								1.64
					2.03							1.84								1.63
					2.05							1.5								1.55
					2.6							1.68								2.17
					2.13							1.86								1.71
					2.07							1.98								1.74
					2.06							1.81								1.66
					1.83							1.55								1.55
					2.56							1.75								2.14
					2.16							1.86								1.75
					2.05							2.01								1.78
					2.03							1.82								1.71
					1.82							1.53								1.56
					2.5							1.85								1.79
					2.15							1.94								1.77
					2.06							2.01								1.81
					2.03							1.67								1.69
					1.81							1.49								1.4
					2.04							1.92								1.74
					2.21							1.93								1.7
					2.37							2.03								1.71
					2.17							1.82								1.58
					1.74							1.52								1.36
					2							1.92								1.74
					2.06							1.91								1.68
					2.19							2.04								1.68
					2.03							1.9								1.58
					1.61							1.52								1.26
					1.96							1.86								1.73
					2.02							1.95								1.66
					2.16							2.07								1.65
					2.04							1.89								1.54
					1.62							1.5								1.4
					1.88							1.85								1.74
					1.98							1.97								1.64
					2.1							2.1								1.59
					1.95							1.97								1.49
					1.61							1.55								1.42
					1.81							1.91								1.81
					2							2.01								1.64
					2.04							2.12								1.55
					1.79							2.04								1.46
					1.49							1.69								1.52
					1.8							1.98								1.87
					1.92							2.1								1.67
					2							2.11								1.58
					1.88							2.02								1.48
					1.49							1.83								1.6
					1.82							2.01								1.93
					1.9							2.12								1.75
					1.95							2.11								1.6
					1.88							2.05								1.52
					1.55							1.95								1.89
					1.81							2.02								1.96
					1.85							2.08								1.72
					1.89							2.09								1.6
					1.78							2.08								1.49
					1.82							2.06								1.72
					1.98							2.25								1.98
					2.01							2.09								1.74
					2							2.06								1.6
					2.02							2.07								1.5
					3.32							2.18								1.32
					2.07							3.12								1.97
					2.08							2.22								1.8
					2.03							2.03								1.62
					2.22							2.07								1.58
					3.37							1.97								1.4
					2.18							3.7								1.82
					2.12							2.16								1.7
					2.04							2.02								1.6
					2.08							2.08								1.55
					2.69							1.92								1.42
					2.21							2.89								1.66
					2.08							2.04								1.61
					2.04							2.04								1.55
					2.04							2.13								1.52
					2.47							2.07								1.44
					2.33							1.97								1.57
					2.01							1.94								1.59
					2.01							2.04								1.56
					1.96							2.24								1.54
					1.87							2.21								1.46
					2.74							1.92								1.53
					2.14							1.94								1.58
					1.98							2.03								1.6
					1.92							2.22								1.57
					1.61							2.26								1.48
					2.55							2.39								1.51
					2.04							2.11								1.58
					1.96							2								1.6
					1.81							2.4								1.59
					1.55							2.76								1.52
					2.29							2.31								1.52
					1.95							2.18								1.58
					1.93							1.99								1.61
					1.7							2.25								1.59
					1.54							2.9								1.58
					1.88							2.15								1.6
					1.91							2.05								1.6
					1.88							2.02								1.65
					1.69							2.26								1.63
					1.49							2.62								1.64
					1.99							2.06								1.9
					2.04							2.05								1.66
					1.94							2.02								1.69
					1.86							2.08								1.67
					2.3							2.45								1.88
					2.03							2.09								2.62
					2.11							2.06								1.71
					1.99							2.05								1.68
					1.9							2.04								1.66
					2.35							2.39								1.98
					2.15															3.15
					2.11															1.74
					2.01															1.67
					1.93															1.65
					2.22															1.86
					2.27															2.71
					2.12															1.79
					2.02															1.68
					1.94															1.65
					1.84															1.94
					2.35															2.16
					2.11															1.8
					1.99															1.68
					1.89															1.64
					1.58															2.38
					2.29															2.1
					2.1															1.82
					1.99															1.65
					1.93															1.61
					1.58															2.24
					2.23															2.11
					2.06															1.78
					1.96															1.64
					1.88															1.61
					1.53															2.05
					2.27															2.11
					2.08															1.81
					1.96															1.68
					1.87															1.65
					1.54															1.64
					2.51															2.13
					2.22															1.8
					1.98															1.7
					1.89															1.75
					1.6															1.73
					2.72															2.14
					2.26															1.86
					2															1.71
					1.88															1.61
					1.65															1.48
					3.16															2.06
					2.4															1.86
					1.97															1.82
					1.86															1.69
					1.73															1.47
					3.6															1.69
					2.54															1.52
					1.97															1.5
					1.87															1.45
					1.83															1.19
					3.26															1.67
					2.26															1.51
					1.96															1.49
					1.89															1.41
					1.89															1.2
					2.63															3.09
					2.14															1.69
					1.97															1.63
					1.93															1.6
					1.91															1.2
					2.28															3.39
					2.09															1.62
					1.94															1.6
					1.92															1.58
					1.88															1.85
					2.08															3.41
					1.97															1.6
					1.95															1.6
					1.94															1.6
					1.86															1.86
																				2.39
																				1.6
																				1.63
																				1.65
																				1.73
																				1.9
																				1.59
																				1.6
																				1.65
																				1.81
																				1.86
																				1.61
																				1.59
																				1.63
																				1.83
																				1.84
																				1.62
																				1.61
																				1.66
																				1.86
																				1.86
																				1.65
																				1.65
																				1.68
																				1.82
																				1.88
																				1.67
																				1.65
																				1.7
																				1.68
																				1.83
																				1.65
																				1.65
																				1.67
																				1.57
																				1.81
																				1.68
																				1.7
																				1.69
																				1.59
																				1.83
																				1.71
																				1.74
																				1.74
																				1.62
																				1.91
																				1.71
																				1.74
																				1.74
																				1.6
																				1.91
																				1.71
																				1.74
																				1.75
																				1.69
																				1.92
																				1.74
																				1.74
																				1.77
																				1.77
																				1.92
																				1.73
																				1.74
																				1.75
																				1.8
																				1.8
																				1.73
																				1.73
																				1.74
																				1.88
																				1.72
																				1.72
																				1.76
																				1.74
																				1.85
																				1.55
																				1.77
																				1.86
																				1.86
																				2.21
																				1.5
																				1.83
																				1.87
																				1.9
																				2.27

## Sheet: (3) Case C
Pre One (m/s)	Pre Two (m/s)	Pre Three (m/s)	Pre Four (m/s)	Pre Five (m/s)	All Pre	Means of Pre		Mid One (m/s)	Mid Two (m/s)	Mid Three (m/s)	Mid Four (m/s)	Mid Five (m/s)	All Mid	Means of Mid		Full One (m/s)	Full Two (m/s)	Full Three (m/s)	Full Four (m/s)	Full Five (m/s)	All Full	Means of Full
1.66	1.74	1.69	1.7	1.78	1.66	1.82174		1.97	1.45	1.4	1.7	1.72	1.97	1.66625		1.86	1.93	1.65	1.71	1.44	1.86	1.62655
1.78	1.71	1.6	1.73	1.79	1.78	1.79361		1.84	1.51	1.56	1.53	1.7	1.84	1.73196		1.28	1.54	1.24	1.29	1.31	1.28	1.61854
1.76	1.69	1.6	1.71	1.78	1.76	1.79913		1.65	1.62	1.56	1.25	1.57	1.65	1.61107		1.26	1.45	1.21	1.25	1.37	1.26	1.5985
1.49	1.48	1.51	1.55	1.53	1.49	1.7413		1.54	1.84	1.43	2.49	1.66	1.54	1.84625		1.55	1.65	1.42	1.14	1.4	1.55	1.6403
1.7	1.71	1.72	1.66	1.73	1.7	1.8348		1.78	1.74	1.54	1.86	2.12	1.78	1.80302		1.81	1.71	1.68	1.67	1.34	1.81	1.61957
1.73	1.66	1.6	1.69	1.73	1.73			1.74	1.42	1.72	1.63	1.88	1.74			1.29	1.42	1.23	1.29	1.31	1.29
1.73	1.66	1.58	1.66	1.71	1.73			1.58	1.46	1.59	1.33	1.56	1.58			1.23	1.36	1.2	1.25	1.48	1.23
1.54	1.48	1.48	1.53	1.44	1.54			1.56	1.74	1.41	4.19	1.63	1.56			1.47	1.41	1.4	1.13	1.56	1.47
1.78	1.68	1.88	1.63	1.73	1.78			1.69	1.9	1.91	2.33	1.97	1.69			1.78	1.65	1.72	1.69	1.42	1.78
1.74	1.66	1.64	1.67	1.72	1.74			1.69	1.41	1.8	1.58	1.91	1.69			1.26	1.41	1.24	1.3	1.37	1.26
1.74	1.66	1.63	1.65	1.71	1.74			1.6	1.42	1.59	2.04	1.55	1.6			1.2	1.28	1.21	1.25	1.53	1.2
1.6	1.47	1.52	1.54	1.47	1.6			1.58	1.68	1.37	4.98	1.57	1.58			1.46	1.31	1.4	1.19	2.11	1.46
1.83	1.69	1.96	1.62	1.75	1.83			1.62	1.78	1.84	3.18	1.97	1.62			1.79	1.92	1.74	1.76	1.41	1.79
1.78	1.66	1.65	1.66	1.72	1.78			1.64	1.41	1.72	1.6	1.85	1.64			1.28	1.44	1.23	1.31	1.42	1.28
1.75	1.65	1.63	1.64	1.71	1.75			1.59	1.54	1.57	1.92	1.54	1.59			1.19	1.26	1.21	1.26	1.48	1.19
1.63	1.49	1.58	1.57	1.5	1.63			1.62	1.72	1.25	2.81	1.57	1.62			1.46	1.35	1.42	1.22	2.01	1.46
1.85	1.67	2.05	1.63	1.89	1.85			1.55	1.73	1.71	2.82	2.03	1.55			1.94	2.02	1.82	1.89	1.32	1.94
1.84	1.66	1.67	1.65	1.73	1.84			1.59	1.53	1.68	1.51	1.93	1.59			1.28	1.47	1.31	1.32	1.41	1.28
1.78	1.67	1.62	1.65	1.73	1.78			1.52	1.56	1.58	1.45	1.56	1.52			1.17	1.29	1.19	1.3	1.46	1.17
1.63	1.53	1.7	1.55	1.58	1.63			1.62	1.7	1.32	1.22	1.55	1.62			1.51	1.34	1.34	1.05	1.55	1.51
1.87	1.69	2.1	1.63	2	1.87			1.78	2.41	1.65	2.74	2	1.78			2.36	1.84	1.89	2.32	1.32	2.36
1.88	1.67	1.69	1.67	1.74	1.88			1.63	2.06	1.66	1.6	1.99	1.63			1.44	1.48	1.33	1.35	1.42	1.44
1.82	1.68	1.63	1.65	1.74	1.82			1.51	1.6	1.63	1.43	1.6	1.51			1.13	1.31	1.19	1.33	1.42	1.13
1.66	1.5	1.76	1.59	1.64	1.66			1.55	1.65	1.37	1.33	1.65	1.55			1.38	1.34	1.48	1.33	1.36	1.38
1.86	1.71	2.25	1.65	2.11	1.86			2.53	3.06	1.64	2.66	2.17	2.53			2.64	1.62	1.96	2.53	1.28	2.64
1.89	1.68	1.76	1.69	1.78	1.89			1.92	2	1.7	1.74	2.06	1.92			1.43	1.4	1.44	1.38	1.46	1.43
1.85	1.67	1.67	1.69	1.78	1.85			1.68	1.59	1.7	1.5	1.64	1.68			1.14	1.33	1.23	1.35	1.41	1.14
1.68	1.48	1.77	1.65	1.75	1.68			1.59	1.73	1.4	1.37	1.69	1.59			1.38	1.41	1.37	1.37	1.34	1.38
1.85	1.82	2.26	1.69	2.23	1.85			2.5	3.92	1.62	2.64	2.93	2.5			2.95	1.58	1.98	2.23	1.26	2.95
1.89	1.71	1.79	1.72	1.83	1.89			2.14	2.15	1.77	2.01	2.37	2.14			1.43	1.43	1.51	1.37	1.45	1.43
1.86	1.69	1.7	1.73	1.83	1.86			1.85	1.59	1.85	1.57	1.8	1.85			1.17	1.31	1.29	1.39	1.42	1.17
1.8	1.51	1.63	1.67	1.8	1.8			1.7	1.74	1.45	1.57	1.71	1.7			1.4	1.43	1.37	1.4	1.34	1.4
1.84	2.52	2.27	1.72	2.2	1.84			2.37	4.56	1.58	2.3	2.93	2.37			3.31	1.67	1.89	1.8	1.19	3.31
1.91	1.75	1.8	1.74	1.86	1.91			2.14	1.87	1.78	1.9	2.19	2.14			1.43	1.55	1.56	1.38	1.47	1.43
1.87	1.72	1.72	1.72	1.83	1.87			1.95	1.58	1.95	1.63	1.7	1.95			1.18	1.31	1.38	1.42	1.4	1.18
2.03	1.53	1.57	1.63	1.83	2.03			1.77	1.76	1.48	1.69	1.82	1.77			1.46	1.4	1.4	1.28	1.39	1.46
1.84	2.96	2.11	1.78	2.07	1.84			2.28	2.86	1.55	2.24	3.11	2.28			3.59	1.79	1.78	1.54	1.34	3.59
1.88	1.78	1.81	1.74	1.88	1.88			2.11	1.97	1.87	1.87	2.08	2.11			1.43	1.7	1.61	1.41	1.49	1.43
1.88	1.72	1.74	1.71	1.84	1.88			2	1.52	1.84	1.69	1.71	2			1.23	1.3	1.52	1.45	1.41	1.23
2.22	1.56	1.57	1.63	1.89	2.22			1.75	1.67	1.42	1.62	1.79	1.75			1.57	1.39	1.5	1.65	1.69	1.57
1.79	2.7	1.87	1.83	2.03	1.79			2.13	2.42	1.53	2.47	2.66	2.13			2.54	1.64	1.67	1.57	1.99	2.54
1.85	1.76	1.77	1.73	1.88	1.85			2.01	1.8	1.66	1.89	1.86	2.01			1.38	1.66	1.59	1.45	1.55	1.38
1.85	1.72	1.76	1.71	1.85	1.85			2.04	1.46	1.95	1.76	1.69	2.04			1.27	1.3	1.61	1.44	1.46	1.27
1.49	1.65	1.53	1.62	2.02	1.49			1.69	1.62	1.6	1.51	1.74	1.69			1.69	1.46	1.62	1.67	1.98	1.69
1.74	2.07	1.77	1.83	1.99	1.74			1.91	2.24	1.62	2.83	2.29	1.91			1.6	1.65	1.62	1.57	2.38	1.6
1.83	1.72	1.74	1.72	1.89	1.83			1.85	1.67	1.58	1.91	1.74	1.85			1.37	1.66	1.56	1.46	1.6	1.37
1.83	1.74	1.74	1.69	1.86	1.83			2.09	1.46	1.7	1.81	1.64	2.09			1.28	1.3	1.65	1.48	1.49	1.28
1.51	1.76	1.57	1.63	2.07	1.51			1.76	1.61	1.51	1.52	1.72	1.76			1.71	1.48	1.65	1.76	2	1.71
1.71	1.85	1.78	1.86	1.99	1.71			1.73	2.24	1.78	2.53	2.21	1.73			1.48	1.56	1.5	1.51	2.13	1.48
1.8	1.71	1.74	1.69	1.87	1.8			1.7	1.71	1.54	1.83	1.7	1.7			1.33	1.59	1.5	1.48	1.59	1.33
1.81	1.74	1.73	1.67	1.83	1.81			2.19	1.45	1.48	1.82	1.57	2.19			1.33	1.32	1.66	1.53	1.54	1.33
1.59	1.81	1.6	1.79	2.29	1.59			1.84	1.64	1.44	1.63	1.55	1.84			1.86	1.69	1.6	1.7	2.12	1.86
1.7	1.86	1.82	1.88	2.14	1.7			1.62	2.12	1.93	2.36	2.11	1.62			1.51	1.52	1.42	1.5	1.91	1.51
1.77	1.71	1.74	1.68	1.86	1.77			1.6	1.62	1.56	1.73	1.67	1.6			1.37	1.52	1.48	1.5	1.61	1.37
1.83	1.74	1.73	1.67	1.84	1.83			2.19	1.45	1.41	1.81	1.47	2.19			1.43	1.38	1.68	1.57	1.64	1.43
1.58	1.88	1.62	1.87	2.44	1.58			1.82	1.66	1.47	1.57	1.46	1.82			1.94	1.68	1.57	1.62	1.9	1.94
1.77	1.9	1.96	1.89	2.08	1.77			1.59	2.03		2.12	2.11	1.59			1.68	1.58	1.39	1.59	1.7	1.68
1.78	1.73	1.75	1.7	1.83	1.78			1.53	1.59		1.65	1.68	1.53			1.4	1.52	1.52	1.52	1.58	1.4
1.81	1.74	1.73	1.69	1.84	1.81			2.15	1.47		1.79	1.41	2.15			1.53	1.52	1.71	1.61	1.64	1.53
1.84	1.96	1.61	1.85	2.16	1.84			1.84	1.53		1.81	1.45	1.84			1.94	1.81	1.57	1.63	1.78	1.94
1.85	1.96	2.2	1.87	2.05	1.85			1.61	2.02		1.91	1.8	1.61			1.58	1.73	1.41	1.87	1.54	1.58
1.82	1.75	1.79	1.69	1.8	1.82			1.48	1.51		1.57	1.65	1.48			1.43	1.63	1.5	1.6	1.53	1.43
1.83	1.72	1.72	1.68	1.79	1.83			1.74	1.46		1.79	1.37	1.74			1.58	1.61	1.72	1.62	1.65	1.58
1.78	1.98	1.59	1.8	1.93	1.78			1.71	1.39		2	1.47	1.71			1.88	1.82	1.59	1.66	1.74	1.88
1.95	2.06	2.29	1.91	1.99	1.95			1.66	2.08		1.82	1.63	1.66			1.52	1.79	1.44	2.29	1.42	1.52
1.87	1.76	1.81	1.7	1.74	1.87			1.48	1.51		1.54	1.54	1.48			1.45	1.61	1.49	1.65	1.52	1.45
1.88	1.72	1.72	1.67	1.73	1.88			1.48	1.38		1.81	1.36	1.48			1.61	1.69	1.68	1.68	1.68	1.61
1.65	1.86	1.59	1.73	1.73	1.65			1.55	1.28		1.88	1.53	1.55			1.91	1.8	1.75	1.69	1.74	1.91
2.06	2.06	2.28	1.89	2.01	2.06			1.71	2.08		1.9	1.76	1.71			1.55	1.8	1.51	2.34	1.44	1.55
1.92	1.77	1.85	1.7	1.74	1.92			1.42	1.5		1.52	1.51	1.42			1.53	1.64	1.54	1.67	1.56	1.53
1.91	1.73	1.75	1.68	1.73	1.91			1.43	1.35		2	1.37	1.43			1.71	1.72	1.78	1.72	1.68	1.71
1.6	1.59	1.62	1.69	1.55	1.6			1.45	1.23		1.67	1.51	1.45			1.93	1.77	1.93	1.76	1.71	1.93
2.1	2	2.15	1.83	1.92	2.1			1.68	2.03		1.91	2.01	1.68			1.79	2.13	1.66	2.44	1.49	1.79
1.98	1.79	1.82	1.71	1.75	1.98			1.55	1.5		1.6	1.58	1.55			1.6	1.7	1.61	1.73	1.59	1.6
1.95	1.74	1.76	1.68	1.76	1.95			1.41	1.33		1.92	1.41	1.41			1.72	1.65	1.74	1.68	1.68	1.72
1.58	1.45	1.63	1.66	1.53	1.58			1.39	1.25		1.63	1.44	1.39			1.97	1.72	2.05	1.78	1.7	1.97
2.11	1.95	2.02	1.82	1.75	2.11			1.61	2.06		1.76	2.17	1.61			1.84	2.12	1.67	2.28	1.28	1.84
2.02	1.83	1.82	1.73	1.75	2.02			1.53	1.51		1.63	1.53	1.53			1.56	1.7	1.65	1.66	1.72	1.56
1.98	1.78	1.78	1.71	1.76	1.98			1.34	1.31		1.66	1.43	1.34			1.66	1.67	1.63	1.72	1.69	1.66
1.59	1.51	1.71	1.69	1.52	1.59			1.32	1.25		1.57	1.45	1.32			1.83	1.8	2	1.85	1.73	1.83
2.13	1.93	1.99	1.84	1.7	2.13			1.51	2.22		1.51	2.09	1.51			2.07	2.28	1.63	1.86	2.02	2.07
2.03	1.83	1.88	1.74	1.77	2.03			1.49	1.43		1.52	1.67	1.49			1.65	1.67	1.66	1.68	1.99	1.65
1.99	1.79	1.83	1.72	1.75	1.99			1.27	1.36		1.5	1.5	1.27			1.7	1.72	1.58	1.77	1.69	1.7
1.66	1.55	1.77	1.75	1.53	1.66			1.36	1.47		1.42	1.49	1.36			1.8	1.79	1.9	1.91	1.78	1.8
2.16	1.9	2.06	1.87	1.72	2.16			1.55	1.68		1.33	2.21	1.55				2.21	1.71	1.68	2.69	1.93
2.06	1.91	1.96	1.79	1.83	2.06			1.4	1.38		1.62	2.01	1.4				1.69	1.77	1.69	2.03	1.54
2.01	1.89	1.89	1.75	1.77	2.01			1.23	1.36		1.44	1.86	1.23				1.72	1.59	1.77	1.69	1.45
1.7	1.66	1.75	1.78	1.66	1.7			1.48	1.48		1.43	1.63	1.48				1.73	1.85	1.88	1.8	1.65
2.16	2.09	2	1.95	2.05	2.16			1.69	1.41		1.46	2.36	1.69				2.24	2.02	1.68	2.72	1.71
2.06	2.01	2	1.85	1.87	2.06			1.31	1.36		1.68	2.42	1.31				1.75	1.93	1.74	1.83	1.42
2	1.92	1.95	1.78	1.78	2			1.22	1.38		1.46	2.65	1.22				1.74	1.6	1.79	1.71	1.36
1.61	1.66	1.7	1.89	1.86	1.61			1.45	1.54		1.51	2.08	1.45				1.72	1.81	1.91	1.81	1.41
	2.13	2.01	2.38	2.32	1.74			1.76			1.85	1.57	1.76				2.09	2.19	1.93		1.65
	2.03	2.02	1.95	1.86	1.71			1.29			1.63	1.5	1.29				1.86	2	2.05		1.41
	1.93	1.95	1.81	1.81	1.69			1.25			1.5	1.38	1.25				1.7	1.61	1.88		1.28
	1.61	1.7	2.24	1.8	1.48			1.44			1.51	1.64	1.44				1.73	1.77	1.93		1.31
	2.14	2	2.35	2.36	1.71			1.46			2.42		1.46					2.54	2.23		1.92
	2.03	2	1.93	1.87	1.66			1.31			1.71		1.31					1.8	2.25		1.44
	1.92	1.97	1.84	1.83	1.66			1.3			1.51		1.3					1.74	1.92		1.26
	1.6	1.76	1.69	1.69	1.48			1.44			1.51		1.44					1.69	2.08		1.35
	2.17	2.01			1.68			1.38			2.68		1.38								2.02
	2.04	2			1.66			1.34			1.9		1.34								1.47
	1.9	1.93			1.66			1.29			1.49		1.29								1.29
	1.62	1.61			1.47			1.52			1.48		1.52								1.34
	2.15				1.69						2.63		1.45								1.84
	2.02				1.66						1.76		1.51								1.48
	1.93				1.65						1.44		1.62								1.31
	1.62				1.49						1.43		1.84								1.34
					1.67						1.99		1.74								1.62
					1.66						1.56		1.42								1.4
					1.67						1.48		1.46								1.33
					1.53						1.46		1.74								1.41
					1.69								1.9								1.58
					1.67								1.41								1.43
					1.68								1.42								1.31
					1.5								1.68								1.43
					1.71								1.78								1.67
					1.68								1.41								1.55
					1.67								1.54								1.31
					1.48								1.72								1.4
					1.82								1.73								1.79
					1.71								1.53								1.7
					1.69								1.56								1.3
					1.51								1.7								1.39
					2.52								2.41								1.64
					1.75								2.06								1.66
					1.72								1.6								1.3
					1.53								1.65								1.46
					2.96								3.06								1.65
					1.78								2								1.66
					1.72								1.59								1.3
					1.56								1.73								1.48
					2.7								3.92								1.56
					1.76								2.15								1.59
					1.72								1.59								1.32
					1.65								1.74								1.69
					2.07								4.56								1.52
					1.72								1.87								1.52
					1.74								1.58								1.38
					1.76								1.76								1.68
					1.85								2.86								1.58
					1.71								1.97								1.52
					1.74								1.52								1.52
					1.81								1.67								1.81
					1.86								2.42								1.73
					1.71								1.8								1.63
					1.74								1.46								1.61
					1.88								1.62								1.82
					1.9								2.24								1.79
					1.73								1.67								1.61
					1.74								1.46								1.69
					1.96								1.61								1.8
					1.96								2.24								1.8
					1.75								1.71								1.64
					1.72								1.45								1.72
					1.98								1.64								1.77
					2.06								2.12								2.13
					1.76								1.62								1.7
					1.72								1.45								1.65
					1.86								1.66								1.72
					2.06								2.03								2.12
					1.77								1.59								1.7
					1.73								1.47								1.67
					1.59								1.53								1.8
					2								2.02								2.28
					1.79								1.51								1.67
					1.74								1.46								1.72
					1.45								1.39								1.79
					1.95								2.08								2.21
					1.83								1.51								1.69
					1.78								1.38								1.72
					1.51								1.28								1.73
					1.93								2.08								2.24
					1.83								1.5								1.75
					1.79								1.35								1.74
					1.55								1.23								1.72
					1.9								2.03								2.09
					1.91								1.5								1.86
					1.89								1.33								1.7
					1.66								1.25								1.73
					2.09								2.06								1.65
					2.01								1.51								1.24
					1.92								1.31								1.21
					1.66								1.25								1.42
					2.13								2.22								1.68
					2.03								1.43								1.23
					1.93								1.36								1.2
					1.61								1.47								1.4
					2.14								1.68								1.72
					2.03								1.38								1.24
					1.92								1.36								1.21
					1.6								1.48								1.4
					2.17								1.41								1.74
					2.04								1.36								1.23
					1.9								1.38								1.21
					1.62								1.54								1.42
					2.15								1.4								1.82
					2.02								1.56								1.31
					1.93								1.56								1.19
					1.62								1.43								1.34
					1.69								1.54								1.89
					1.6								1.72								1.33
					1.6								1.59								1.19
					1.51								1.41								1.48
					1.72								1.91								1.96
					1.6								1.8								1.44
					1.58								1.59								1.23
					1.48								1.37								1.37
					1.88								1.84								1.98
					1.64								1.72								1.51
					1.63								1.57								1.29
					1.52								1.25								1.37
					1.96								1.71								1.89
					1.65								1.68								1.56
					1.63								1.58								1.38
					1.58								1.32								1.4
					2.05								1.65								1.78
					1.67								1.66								1.61
					1.62								1.63								1.52
					1.7								1.37								1.5
					2.1								1.64								1.67
					1.69								1.7								1.59
					1.63								1.7								1.61
					1.76								1.4								1.62
					2.25								1.62								1.62
					1.76								1.77								1.56
					1.67								1.85								1.65
					1.77								1.45								1.65
					2.26								1.58								1.5
					1.79								1.78								1.5
					1.7								1.95								1.66
					1.63								1.48								1.6
					2.27								1.55								1.42
					1.8								1.87								1.48
					1.72								1.84								1.68
					1.57								1.42								1.57
					2.11								1.53								1.39
					1.81								1.66								1.52
					1.74								1.95								1.71
					1.57								1.6								1.57
					1.87								1.62								1.41
					1.77								1.58								1.5
					1.76								1.7								1.72
					1.53								1.51								1.59
					1.77								1.78								1.44
					1.74								1.54								1.49
					1.74								1.48								1.68
					1.57								1.44								1.75
					1.78								1.93								1.51
					1.74								1.56								1.54
					1.73								1.41								1.78
					1.6								1.47								1.93
					1.82								1.7								1.66
					1.74								1.53								1.61
					1.73								1.25								1.74
					1.62								2.49								2.05
					1.96								1.86								1.67
					1.75								1.63								1.65
					1.73								1.33								1.63
					1.61								4.19								2
					2.2								2.33								1.63
					1.79								1.58								1.66
					1.72								2.04								1.58
					1.59								4.98								1.9
					2.29								3.18								1.71
					1.81								1.6								1.77
					1.72								1.92								1.59
					1.59								2.81								1.85
					2.28								2.82								2.02
					1.85								1.51								1.93
					1.75								1.45								1.6
					1.62								1.22								1.81
					2.15								2.74								2.19
					1.82								1.6								2
					1.76								1.43								1.61
					1.63								1.33								1.77
					2.02								2.66								2.54
					1.82								1.74								1.8
					1.78								1.5								1.74
					1.71								1.37								1.69
					1.99								2.64								1.71
					1.88								2.01								1.29
					1.83								1.57								1.25
					1.77								1.57								1.14
					2.06								2.3								1.67
					1.96								1.9								1.29
					1.89								1.63								1.25
					1.75								1.69								1.13
					2								2.24								1.69
					2								1.87								1.3
					1.95								1.69								1.25
					1.7								1.62								1.19
					2.01								2.47								1.76
					2.02								1.89								1.31
					1.95								1.76								1.26
					1.7								1.51								1.22
					2								2.83								1.89
					2								1.91								1.32
					1.97								1.81								1.3
					1.76								1.52								1.05
					2.01								2.53								2.32
					2								1.83								1.35
					1.93								1.82								1.33
					1.61								1.63								1.33
					1.7								2.36								2.53
					1.73								1.73								1.38
					1.71								1.81								1.35
					1.55								1.57								1.37
					1.66								2.12								2.23
					1.69								1.65								1.37
					1.66								1.79								1.39
					1.53								1.81								1.4
					1.63								1.91								1.8
					1.67								1.57								1.38
					1.65								1.79								1.42
					1.54								2								1.28
					1.62								1.82								1.54
					1.66								1.54								1.41
					1.64								1.81								1.45
					1.57								1.88								1.65
					1.63								1.9								1.57
					1.65								1.52								1.45
					1.65								2								1.44
					1.55								1.67								1.67
					1.63								1.91								1.57
					1.67								1.6								1.46
					1.65								1.92								1.48
					1.59								1.63								1.76
					1.65								1.76								1.51
					1.69								1.63								1.48
					1.69								1.66								1.53
					1.65								1.57								1.7
					1.69								1.51								1.5
					1.72								1.52								1.5
					1.73								1.5								1.57
					1.67								1.42								1.62
					1.72								1.33								1.59
					1.74								1.62								1.52
					1.72								1.44								1.61
					1.63								1.43								1.63
					1.78								1.46								1.87
					1.74								1.68								1.6
					1.71								1.46								1.62
					1.63								1.51								1.66
					1.83								1.85								2.29
					1.73								1.63								1.65
					1.71								1.5								1.68
					1.62								1.51								1.69
					1.83								2.42								2.34
					1.72								1.71								1.67
					1.69								1.51								1.72
					1.63								1.51								1.76
					1.86								2.68								2.44
					1.69								1.9								1.73
					1.67								1.49								1.68
					1.79								1.48								1.78
					1.88								2.63								2.28
					1.68								1.76								1.66
					1.67								1.44								1.72
					1.87								1.43								1.85
					1.89								1.99								1.86
					1.7								1.56								1.68
					1.69								1.48								1.77
					1.85								1.46								1.91
					1.87								1.72								1.68
					1.69								1.7								1.69
					1.68								1.57								1.77
					1.8								1.66								1.88
					1.91								2.12								1.68
					1.7								1.88								1.74
					1.67								1.56								1.79
					1.73								1.63								1.91
					1.89								1.97								1.93
					1.7								1.91								2.05
					1.68								1.55								1.88
					1.69								1.57								1.93
					1.83								1.97								2.23
					1.71								1.85								2.25
					1.68								1.54								1.92
					1.66								1.57								2.08
					1.82								2.03								1.44
					1.73								1.93								1.31
					1.71								1.56								1.37
					1.69								1.55								1.4
					1.84								2								1.34
					1.74								1.99								1.31
					1.72								1.6								1.48
					1.75								1.65								1.56
					1.87								2.17								1.42
					1.79								2.06								1.37
					1.75								1.64								1.53
					1.78								1.69								2.11
					1.95								2.93								1.41
					1.85								2.37								1.42
					1.78								1.8								1.48
					1.89								1.71								2.01
					2.38								2.93								1.32
					1.95								2.19								1.41
					1.81								1.7								1.46
					2.24								1.82								1.55
					2.35								3.11								1.32
					1.93								2.08								1.42
					1.84								1.71								1.42
					1.69								1.79								1.36
					1.78								2.66								1.28
					1.79								1.86								1.46
					1.78								1.69								1.41
					1.53								1.74								1.34
					1.73								2.29								1.26
					1.73								1.74								1.45
					1.71								1.64								1.42
					1.44								1.72								1.34
					1.73								2.21								1.19
					1.72								1.7								1.47
					1.71								1.57								1.4
					1.47								1.55								1.39
					1.75								2.11								1.34
					1.72								1.67								1.49
					1.71								1.47								1.41
					1.5								1.46								1.69
					1.89								2.11								1.99
					1.73								1.68								1.55
					1.73								1.41								1.46
					1.58								1.45								1.98
					2								1.8								2.38
					1.74								1.65								1.6
					1.74								1.37								1.49
					1.64								1.47								2
					2.11								1.63								2.13
					1.78								1.54								1.59
					1.78								1.36								1.54
					1.75								1.53								2.12
					2.23								1.76								1.91
					1.83								1.51								1.61
					1.83								1.37								1.64
					1.8								1.51								1.9
					2.2								2.01								1.7
					1.86								1.58								1.58
					1.83								1.41								1.64
					1.83								1.44								1.78
					2.07								2.17								1.54
					1.88								1.53								1.53
					1.84								1.43								1.65
					1.89								1.45								1.74
					2.03								2.09								1.42
					1.88								1.67								1.52
					1.85								1.5								1.68
					2.02								1.49								1.74
					1.99								2.21								1.44
					1.89								2.01								1.56
					1.86								1.86								1.68
					2.07								1.63								1.71
					1.99								2.36								1.49
					1.87								2.42								1.59
					1.83								2.65								1.68
					2.29								2.08								1.7
					2.14								1.57								1.28
					1.86								1.5								1.72
					1.84								1.38								1.69
					2.44								1.64								1.73
					2.08																2.02
					1.83																1.99
					1.84																1.69
					2.16																1.78
					2.05																2.69
					1.8																2.03
					1.79																1.69
					1.93																1.8
					1.99																2.72
					1.74																1.83
					1.73																1.71
					1.73																1.81
					2.01
					1.74
					1.73
					1.55
					1.92
					1.75
					1.76
					1.53
					1.75
					1.75
					1.76
					1.52
					1.7
					1.77
					1.75
					1.53
					1.72
					1.83
					1.77
					1.66
					2.05
					1.87
					1.78
					1.86
					2.32
					1.86
					1.81
					1.8
					2.36
					1.87
					1.83
					1.69

## Sheet: (3) Case D
Pre One (m/s)	Pre Two (m/s)	Pre Three (m/s)	All Pre	Means of Pre		Mid One (m/s)	Mid Two (m/s)	Mid Three (m/s)	All Mid	Means of Mid		Full One (m/s)	Full Two (m/s)	Full Three (m/s)	Full Four (m/s)	Full Five (m/s)	All Full	Means of Full
2.19	2.46	2.38	2.19	1.95121		1.59	2.42	2.11	1.59	1.8506		1.89	2.14	1.98	1.3	1.57	1.89	2.01757
1.86	2.06	2.02	1.86	2.06545		1.78	2.05	2.1	1.78	1.94492		1.86	2.14	1.8	1.37	1.43	1.86	2.5375
1.8	1.92	1.98	1.8	1.94814		1.94	1.97	1.74	1.94	2.08979		1.69	2.37	1.6	1.45	1.5	1.69	1.608
1.85	1.88	1.89	1.85			2.02	1.74	1.68	2.02			1.63	2.19	1.64	1.72	1.73	1.63	1.83217
1.83	1.67	1.77	1.83			2.25	2.15	2.16	2.25			0.69	2.55	1.99	1.98	1.94	0.69	1.78648
2.38	2.62	2.33	2.38			1.58	2.19	1.82	1.58			1.88	2.39	1.69	1.69	1.81	1.88
1.85	2.13	1.98	1.85			1.77	1.86	1.82	1.77			1.87	2.02	1.6	1.71	1.84	1.87
1.77	1.91	1.95	1.77			1.92	1.83	1.57	1.92			1.34	2.27	1.67	1.75	1.84	1.34
1.98	1.9	1.86	1.98			1.77	1.68	1.61	1.77			1.62	2.79	1.97	1.77	1.85	1.62
2.39	1.81	1.62	2.39			2.21	1.97	2.09	2.21			1.16	2.64	1.55	2.17	2.12	1.16
2.48	2.76	2.32	2.48			1.57	2.02	1.72	1.57			1.92	1.96	1.58	1.89	2.09	1.92
1.88	2.23	2.02	1.88			1.72	1.75	1.72	1.72			1.85	2.08	1.61	1.9	2.11	1.85
1.76	1.9	1.98	1.76			1.72	1.74	1.49	1.72			1.41	2.95	1.9	1.87	1.99	1.41
1.81	1.92	1.89	1.81			1.8	1.75	1.45	1.8			1.59	2.86	1.56	1.81	1.99	1.59
2.24	1.7	1.57	2.24			2.12	2.03	1.91	2.12			1.54	2.26	1.57	2.25	2.3	1.54
2.48	2.74	2.3	2.48			1.57	2.01	1.69	1.57			1.86	2.13	1.64	2.06	2.32	1.86
1.95	2.28	2.12	1.95			1.63	1.72	1.7	1.63			1.87	2.95	1.6	2.11	2.33	1.87
1.79	1.92	2.01	1.79			1.68	1.72	1.45	1.68			1.76	3.14	1.55	1.97	2.22	1.76
1.69	1.96	1.93	1.69			1.72	1.9	1.43	1.72			1.64	2.97	1.6	2.88	2.01	1.64
1.89	1.95	1.56	1.89			1.98	1.92	1.82	1.98			1.61	2.48	1.76	2.39	1.99	1.61
2.46	2.68	2.26	2.46			1.58	1.91	1.69	1.58			1.78	2.71	1.44	2.23	1.77	1.78
2	2.25	2.12	2			1.61	1.72	1.67	1.61			2.04	2.65	1.85	2.24	1.69	2.04
1.82	1.94	2.03	1.82			1.75	1.71	1.43	1.75			1.84	3.24	1.71	2.05	1.65	1.84
1.62	1.94	1.83	1.62			1.62	2.02	1.42	1.62			1.63	3.02	1.48	1.99	2	1.63
1.39	2.14	1.35	1.39			1.74	1.73	2.24	1.74			1.61		1.51	2.41	1.98	1.61
2.38	2.7	2.36	2.38			1.59	1.88	1.67	1.59			1.68		1.68	2.27	1.73	1.68
2.05	2.23	2.19	2.05			1.66	1.73	1.61	1.66			2.14		1.53	2.26	1.56	2.14
1.84	1.97	2.02	1.84			1.82	1.76	1.4	1.82			1.9		1.41	2.07	1.57	1.9
1.64	1.92	1.85	1.64			1.56	2.02	1.42	1.56			1.64		1.48	2.17	2.02	1.64
1.29	1.87	1.21	1.29			1.63	1.59	2.63	1.63			1.44		1.63	1.84	1.95	1.44
2.23	2.88	2.48	2.23			1.61	1.88	1.67	1.61			1.61		1.55	1.74	1.58	1.61
2.08	2.37	2.22	2.08			1.71	1.74	1.53	1.71			1.89		1.35	1.61	1.49	1.89
1.88	2.01	2.03	1.88			1.89	1.79	1.38	1.89			1.87		1.44	1.68	1.51	1.87
1.62	1.94	1.92	1.62			1.56	2.02	1.67	1.56			1.6		1.62	2.03	1.96	1.6
1.27	1.65	1.37	1.27			1.62	1.54	2.51	1.62			1.27		1.52	1.85	1.97	1.27
2.04	2.98	2.48	2.04			1.61	1.82	1.66	1.61			1.66		1.3	1.71	1.62	1.66
2.09	2.23	2.18	2.09			1.77	1.74	1.59	1.77			1.75		1.38	1.56	1.43	1.75
1.93	2.06	2.05	1.93			1.95	1.87	1.45	1.95			1.79		1.58	1.56	1.45	1.79
1.68	1.94	1.84	1.68			1.56	1.91	1.46	1.56			1.67		1.63	1.95	1.97	1.67
1.34	1.54	1.23	1.34			1.64	1.54	2.25	1.64			1.43		1.37	1.9	1.99	1.43
1.99	2.84	2.43	1.99			1.62	1.75	2.94	1.62			1.8			1.7	1.57	1.8
2.08	2.16	2.13	2.08			1.86	1.72	2.84	1.86			1.86			1.46	1.38	1.86
1.92	2.09	2	1.92			1.89	1.88	2.34	1.89			1.83			1.46	1.4	1.83
1.72	1.95	1.85	1.72			1.61	1.82	2.01	1.61			1.7			1.84	1.75	1.7
1.51	1.47	1.32	1.51			1.74	1.61	2.82	1.74			1.79			1.93	2.03	1.79
2.04	2.9	2.27	2.04			1.64	1.68	2.74	1.64			2.04			1.6	1.55	2.04
2.11	2.19	2.05	2.11			1.86	1.74	2.54	1.86			2.27			1.38	1.33	2.27
1.92	2.06	1.97	1.92			1.88	1.91	2.19	1.88			1.93			1.41	1.39	1.93
1.76	1.99	1.86	1.76			1.69	1.89	2.31	1.69			1.72			1.78	1.64	1.72
1.67	1.52	1.48	1.67			1.95	1.74	2.95	1.95			1.95			1.98	1.88	1.95
2.17	2.91	2.18	2.17			1.75	1.61	2.79	1.75			2.27			1.66	2.03	2.27
2.09	2.23	2.03	2.09			2.2	1.78	2.58	2.2			3.06			1.36	1.61	3.06
1.92	2.03	1.96	1.92			2.08	1.95	2.18	2.08			2.59			1.35	1.51	2.59
1.76	1.96	1.89	1.76			1.84	1.9	2.2	1.84			2.03			1.6	1.53	2.03
1.77	1.49	1.56	1.77			1.99	1.92	2.66	1.99			2.14			2.01		2.14
2.29	2.62	2.16	2.29			1.92	1.59	3.11	1.92			2.28			1.72		2.28
2.11	2.32	2.02	2.11			2.17	1.87	2.55	2.17			2.82			1.35		2.82
1.92	2	1.96	1.92			1.97	2.01	2.13	1.97			3.97			1.34		3.97
1.79	1.97	1.9	1.79			1.82	1.84	2.01	1.82			3.92			1.53		3.92
1.8	1.59	1.62	1.8			1.98	2.08	2.89	1.98			2.92			1.88		2.92
2.3	2.8	2.16	2.3			2.01	1.59	2.92	2.01			2.05			1.88		2.05
2.14	2.29	2.05	2.14			2.08	1.93	2.38	2.08			2.45			1.54		2.45
1.92	2.01	1.97	1.92			1.95	1.97	2.14	1.95			3.67			1.98		3.67
1.83	1.97	1.9	1.83			1.85	1.92	1.94	1.85			3.44			2.09		3.44
1.77	1.57	1.59	1.77			2.01	1.98	2.59	2.01			2.69			1.71		2.69
2.27	3.33	2.19	2.27			2.05	1.61	2.83	2.05			2			1.97		2
2.12	2.39	2.08	2.12			2	2.01	2.29	2			2.16			1.92		2.16
1.93	2.01	1.99	1.93			1.95	2.1	2.17	1.95			3.26			1.77		3.26
1.87	2	1.91	1.87			1.98	1.84	1.86	1.98			3.13			2.06		3.13
1.81	1.63	1.54	1.81			1.94	1.76	2.3	1.94			2.57					2.57
2.19	3.32	2.25	2.19			2.01	1.7	2.49	2.01								2.14
2.11	2.48	2.11	2.11			1.91	2.1	2.35	1.91								2.14
1.97	2.04	2.02	1.97			1.96	2.36	2.25	1.96								2.37
1.93	2.05	1.89	1.93			1.91	2.16	1.95	1.91								2.19
1.86	1.66	1.5	1.86			1.87	1.82	2.45	1.87								2.55
2.18	2.74	2.36	2.18			1.89	1.7	2.04	1.89								2.39
2.04	2.34	2.15	2.04			1.86	2.1	2.36	1.86								2.02
2	2.06	2.06	2			1.78	2.31	2.42	1.78								2.27
1.97	2.1	1.9	1.97			1.78	2.28	1.88	1.78								2.79
1.87	1.77	1.49	1.87			2.18	2.01	2.64	2.18								2.64
2.13	2.29	2.44	2.13			1.9	1.69	2	1.9								1.96
2.02	2.16	2.18	2.02			1.85	1.97	2.5	1.85								2.08
1.99	2.11	2.09	1.99			1.8	2.24	2.18	1.8								2.95
1.97	2.07	1.91	1.97			1.77	2.44	1.96	1.77								2.86
1.87	1.65	1.48	1.87			2.09	2.5	2.71	2.09								2.26
2.06	2.14	2.46	2.06			1.88	1.64	1.84	1.88								2.13
1.99	2.12	2.2	1.99			1.79	1.87	2.42	1.79								2.95
2.01	2.16	2.1	2.01			1.73	2.04	1.9	1.73								3.14
1.95	2.07	1.92	1.95			1.98	2.69	2.1	1.98								2.97
1.84	1.57	1.51	1.84			2.47	2.62	2.57	2.47								2.48
2	2.04	2.4	2			1.95	1.69	1.72	1.95								2.71
1.98	2.1	2.15	1.98			1.81	1.92	2.07	1.81								2.65
2.02	2.2	2.07	2.02			1.72	2.19	2.03	1.72								3.24
1.97	2.08	1.95	1.97			1.91	2.93	1.68	1.91								3.02
1.83	1.53	1.59	1.83			2.3	2.59	2.39	2.3								1.98
1.92	2.02	2.27	1.92			2.1	1.69		2.1								1.8
1.96	2.09	2.09	1.96			1.95	1.83		1.95								1.6
2.01	2.21	2.05	2.01			1.76	2.1		1.76								1.64
1.97	2.08	1.91	1.97			1.9	2.78		1.9								1.99
1.84	1.55	1.62	1.84			2.15	2.32		2.15								1.69
1.86	2.02	2.16	1.86				1.65		2.42								1.6
1.95	2.09	2.07	1.95				1.78		2.05								1.67
2.01	2.2	2.05	2.01				2.26		1.97								1.97
1.95	2	1.95	1.95				2.62		1.74								1.55
1.79	1.51	1.66	1.79				2.23		2.15								1.58
1.83	2.03	2.1	1.83				1.62		2.19								1.61
1.95	2.1	2.06	1.95				1.73		1.86								1.9
2.03	2.18	2.06	2.03				2.06		1.83								1.56
1.96	1.94	1.92	1.96				2.49		1.68								1.57
1.75	1.48	1.59	1.75				2.25		1.97								1.64
1.83	2.06	2.05	1.83				1.59		2.02								1.6
1.95	2.1	2.05	1.95				1.72		1.75								1.55
2.04	2.16	2.05	2.04				2.21		1.74								1.6
1.96	1.92	1.95	1.96				2.29		1.75								1.76
1.7	1.47	1.56	1.7				2.26		2.03								1.44
1.88	2.04	2.01	1.88				1.57		2.01								1.85
1.99	2.08	2.05	1.99				1.67		1.72								1.71
2.06	2.14	2.05	2.06				2.24		1.72								1.48
1.97	1.94	1.97	1.97				2.16		1.9								1.51
1.64	1.48	1.52	1.64				2.24		1.92								1.68
1.95	2.01	1.97	1.95				1.57		1.91								1.53
2.04	2.07	2.03	2.04				1.63		1.72								1.41
2.08	2.12	2.06	2.08				2.1		1.71								1.48
1.97	1.93	1.97	1.97				2.08		2.02								1.63
1.6	1.52	1.45	1.6				2.04		1.73								1.55
2.11	2.01	1.95	2.11				1.59		1.88								1.35
2.1	2.09	2.01	2.1				1.62		1.73								1.44
2.07	2.12	2.04	2.07				1.92		1.76								1.62
1.96	1.92	1.95	1.96				2		2.02								1.52
1.64	1.5	1.45	1.64				2.03		1.59								1.3
2.39	2.01	1.94	2.39						1.88								1.38
2.15	2.09	1.99	2.15						1.74								1.58
2.07	2.15	2.01	2.07						1.79								1.63
1.99	1.93	1.91	1.99						2.02								1.37
1.84	1.53	1.38	1.84						1.54								1.3
2.59	2.03	1.94	2.59						1.82								1.37
2.2	2.09	1.99	2.2						1.74								1.45
2.07	2.16	1.97	2.07						1.87								1.72
1.99	1.98	1.88	1.99						1.91								1.98
1.99	1.52	1.33	1.99						1.54								1.69
	2.06		2.46						1.75								1.71
	2.11		2.06						1.72								1.75
	2.15		1.92						1.88								1.77
	1.92		1.88						1.82								2.17
	1.48		1.67						1.61								1.89
			2.62						1.68								1.9
			2.13						1.74								1.87
			1.91						1.91								1.81
			1.9						1.89								2.25
			1.81						1.74								2.06
			2.76						1.61								2.11
			2.23						1.78								1.97
			1.9						1.95								2.88
			1.92						1.9								2.39
			1.7						1.92								2.23
			2.74						1.59								2.24
			2.28						1.87								2.05
			1.92						2.01								1.99
			1.96						1.84								2.41
			1.95						2.08								2.27
			2.68						1.59								2.26
			2.25						1.93								2.07
			1.94						1.97								2.17
			1.94						1.92								1.84
			2.14						1.98								1.74
			2.7						1.61								1.61
			2.23						2.01								1.68
			1.97						2.1								2.03
			1.92						1.84								1.85
			1.87						1.76								1.71
			2.88						1.7								1.56
			2.37						2.1								1.56
			2.01						2.36								1.95
			1.94						2.16								1.9
			1.65						1.82								1.7
			2.98						1.7								1.46
			2.23						2.1								1.46
			2.06						2.31								1.84
			1.94						2.28								1.93
			1.54						2.01								1.6
			2.84						1.69								1.38
			2.16						1.97								1.41
			2.09						2.24								1.78
			1.95						2.44								1.98
			1.47						2.5								1.66
			2.9						1.64								1.36
			2.19						1.87								1.35
			2.06						2.04								1.6
			1.99						2.69								2.01
			1.52						2.62								1.72
			2.91						1.69								1.35
			2.23						1.92								1.34
			2.03						2.19								1.53
			1.96						2.93								1.88
			1.49						2.59								1.88
			2.62						1.69								1.54
			2.32						1.83								1.98
			2						2.1								2.09
			1.97						2.78								1.71
			1.59						2.32								1.97
			2.8						1.65								1.92
			2.29						1.78								1.77
			2.01						2.26								2.06
			1.97						2.62								1.57
			1.57						2.23								1.43
			3.33						1.62								1.5
			2.39						1.73								1.73
			2.01						2.06								1.94
			2						2.49								1.81
			1.63						2.25								1.84
			3.32						1.59								1.84
			2.48						1.72								1.85
			2.04						2.21								2.12
			2.05						2.29								2.09
			1.66						2.26								2.11
			2.74						1.57								1.99
			2.34						1.67								1.99
			2.06						2.24								2.3
			2.1						2.16								2.32
			1.77						2.24								2.33
			2.29						1.57								2.22
			2.16						1.63								2.01
			2.11						2.1								1.99
			2.07						2.08								1.77
			1.65						2.04								1.69
			2.14						1.59								1.65
			2.12						1.62								2
			2.16						1.92								1.98
			2.07						2								1.73
			1.57						2.03								1.56
			2.04						2.11								1.57
			2.1						2.1								2.02
			2.2						1.74								1.95
			2.08						1.68								1.58
			1.53						2.16								1.49
			2.02						1.82								1.51
			2.09						1.82								1.96
			2.21						1.57								1.97
			2.08						1.61								1.62
			1.55						2.09								1.43
			2.02						1.72								1.45
			2.09						1.72								1.97
			2.2						1.49								1.99
			2						1.45								1.57
			1.51						1.91								1.38
			2.03						1.69								1.4
			2.1						1.7								1.75
			2.18						1.45								2.03
			1.94						1.43								1.55
			1.48						1.82								1.33
			2.06						1.69								1.39
			2.1						1.67								1.64
			2.16						1.43								1.88
			1.92						1.42								2.03
			1.47						2.24								1.61
			2.04						1.67								1.51
			2.08						1.61								1.53
			2.14						1.4
			1.94						1.42
			1.48						2.63
			2.01						1.67
			2.07						1.53
			2.12						1.38
			1.93						1.67
			1.52						2.51
			2.01						1.66
			2.09						1.59
			2.12						1.45
			1.92						1.46
			1.5						2.25
			2.01						2.94
			2.09						2.84
			2.15						2.34
			1.93						2.01
			1.53						2.82
			2.03						2.74
			2.09						2.54
			2.16						2.19
			1.98						2.31
			1.52						2.95
			2.06						2.79
			2.11						2.58
			2.15						2.18
			1.92						2.2
			1.48						2.66
			2.38						3.11
			2.02						2.55
			1.98						2.13
			1.89						2.01
			1.77						2.89
			2.33						2.92
			1.98						2.38
			1.95						2.14
			1.86						1.94
			1.62						2.59
			2.32						2.83
			2.02						2.29
			1.98						2.17
			1.89						1.86
			1.57						2.3
			2.3						2.49
			2.12						2.35
			2.01						2.25
			1.93						1.95
			1.56						2.45
			2.26						2.04
			2.12						2.36
			2.03						2.42
			1.83						1.88
			1.35						2.64
			2.36						2
			2.19						2.5
			2.02						2.18
			1.85						1.96
			1.21						2.71
			2.48						1.84
			2.22						2.42
			2.03						1.9
			1.92						2.1
			1.37						2.57
			2.48						1.72
			2.18						2.07
			2.05						2.03
			1.84						1.68
			1.23						2.39
			2.43
			2.13
			2
			1.85
			1.32
			2.27
			2.05
			1.97
			1.86
			1.48
			2.18
			2.03
			1.96
			1.89
			1.56
			2.16
			2.02
			1.96
			1.9
			1.62
			2.16
			2.05
			1.97
			1.9
			1.59
			2.19
			2.08
			1.99
			1.91
			1.54
			2.25
			2.11
			2.02
			1.89
			1.5
			2.36
			2.15
			2.06
			1.9
			1.49
			2.44
			2.18
			2.09
			1.91
			1.48
			2.46
			2.2
			2.1
			1.92
			1.51
			2.4
			2.15
			2.07
			1.95
			1.59
			2.27
			2.09
			2.05
			1.91
			1.62
			2.16
			2.07
			2.05
			1.95
			1.66
			2.1
			2.06
			2.06
			1.92
			1.59
			2.05
			2.05
			2.05
			1.95
			1.56
			2.01
			2.05
			2.05
			1.97
			1.52
			1.97
			2.03
			2.06
			1.97
			1.45
			1.95
			2.01
			2.04
			1.95
			1.45
			1.94
			1.99
			2.01
			1.91
			1.38
			1.94
			1.99
			1.97
			1.88
			1.33

## Sheet: (3) Case E
Pre One (m/s)	Pre Two (m/s)	Pre Three (m/s)	Pre Four (m/s)	Pre Five (m/s)	All Pre	Means of Pre		Mid One (m/s)	Mid Two (m/s)	Mid Three (m/s)	Mid Four (m/s)	Mid Five (m/s)	All Mid	Means of Mid		Full One (m/s)	Full Two (m/s)	Full Three (m/s)	Full Four (m/s)	Full Five (m/s)	All Full	Means of Full
2.05	1.96	1.94	1.98	2.2	2.05	1.97708		1.64	1.25	1.72	2.19	2.06	1.64	1.80565		1.74	1.72	1.84	1.71	1.72	1.74	1.84417
1.89	1.85	1.84	1.98	1.97	1.89	1.95308		1.55	1.49	1.55	1.83	1.63	1.55	1.79		1.68	1.46	1.41	1.51	1.69	1.68	1.9381
1.89	1.84	1.73	1.87	1.85	1.89	1.83042		1.54	1.56	1.51	2.15	1.63	1.54	1.67991		1.47	1.55	1.42	1.33	1.68	1.47	1.8875
1.77	1.95	2.02	1.62	1.75	1.77	1.85216		2.35	1.94	1.89	1.82	1.93	2.35	1.83063		1.74	2.24	1.67	2.22	1.94	1.74	2.14206
2.04	2	2	1.93	2.13	2.04	1.8907		2.07	1.25	1.7	2.13	2.24	2.07	1.7737		1.77	1.74	1.83	1.75	1.74	1.77	2.06847
1.89	1.85	1.87	1.93	1.92	1.89			1.58	1.53	1.5	1.74	1.73	1.58			1.61	1.44	1.42	1.54	1.65	1.61
1.86	1.82	1.73	1.82	1.81	1.86			1.69	1.57	1.5	2.09	1.76	1.69			1.45	1.53	1.39	1.39	1.64	1.45
1.87	1.91	1.84	1.63	1.73	1.87			2.89	3.24	1.82	1.59	1.93	2.89			1.93	2.07	1.63	2	1.85	1.93
1.99	2.1	2.01	1.93	2.13	1.99			2.54	1.36	1.7	2.07	2.21	2.54			1.76	2	1.77	1.81	1.75	1.76
1.88	1.85	1.85	1.87	1.91	1.88			1.6	1.53	1.51	1.45	1.74	1.6			1.51	1.44	1.42	1.56	1.55	1.51
1.88	1.79	1.73	1.8	1.81	1.88			1.61	1.56	1.5	2.14	1.84	1.61			1.46	1.52	1.41	1.47	1.59	1.46
1.99	1.85	1.77	1.62	1.73	1.99			2.83	3.83	2.14	1.42	2.13	2.83			2.04	1.95	1.64	1.81	1.8	2.04
1.89	2.12	1.91	1.9	2.07	1.89			2.18	1.31	1.69	2.04	2.16	2.18			1.76	2.23	1.91	2.07	1.76	1.76
1.92	1.84	1.83	1.79	1.87	1.92			1.65	1.51	1.54	1.32	1.97	1.65			1.49	1.54	1.57	1.71	1.48	1.49
1.87	1.76	1.72	1.73	1.77	1.87			1.7	1.55	1.53	2.01	2.22	1.7			1.53	1.49	1.44	1.65	1.56	1.53
2.18	1.89	1.7	1.62	1.75	2.18			3.19	2.02	1.62	1.34	2.09	3.19			1.92	1.92	1.65	1.74	1.75	1.92
1.9	2.05	1.94	1.82	1.99	1.9			1.81	1.37	1.73	1.95	2.07	1.81			1.9	2.44	2.83	2.35	1.8	1.9
1.93	1.85	1.83	1.71	1.82	1.93			1.69	1.57	1.58	1.31	2.2	1.69			1.47	1.8	1.95	2.03	1.41	1.47
1.85	1.76	1.75	1.69	1.73	1.85			1.72	1.6	1.58	1.81	2.63	1.72			1.55	1.5	1.78	1.68	1.52	1.55
2.55	1.87	1.62	1.61	1.76	2.55			2.98	2.33	1.9	1.32	2.09	2.98			1.8	1.87	1.94	1.86	1.75	1.8
1.88	2.08	2.04	1.8	1.91	1.88			1.65	1.41	1.8	1.75	1.8	1.65			2.03	2.49	2.36	2.46	1.92	2.03
1.95	1.88	1.84	1.71	1.81	1.95			1.61	1.59	1.62	1.33	2.25	1.61			1.53	1.97	1.7	1.99	1.88	1.53
1.87	1.72	1.69	1.67	1.68	1.87			1.68	1.62	1.6	1.82	2.29	1.68			1.57	1.69	1.77	1.69	1.58	1.57
1.97	1.78	1.62	1.64	1.76	1.97			2.25	2.03	1.98	1.44	1.9	2.25			1.81	1.98	1.96	1.83	1.73	1.81
1.97	2.13	2.02	1.77	1.9	1.97			1.64	1.43	1.89	1.88	1.78	1.64			1.95	2.33	2.11	2.12	2.08	1.95
1.92	1.86	1.88	1.78	1.78	1.92			1.54	1.66	1.65	1.52	1.68	1.54			1.5	1.99	1.68	2.43	1.59	1.5
1.86	1.79	1.75	1.67	1.68	1.86			1.59	1.72	1.63	2.09	1.84	1.59			1.58	2.01	1.71	1.7	1.59	1.58
1.69	1.77	1.61	1.6	1.74	1.69			3.43	2.31	2.02	1.72	1.71	3.43			1.86	2.4	1.9	1.74	2.04	1.86
2.12	2.29	1.95	1.76	1.91	2.12			1.69	1.45	2	2.3	1.76	1.69			2.24	2.42	1.88	2.14	2.13	2.24
1.93	1.85	1.88	1.79	1.73	1.93			1.52	1.81	1.72	1.76	1.37	1.52			1.72	2.06	1.59	2.01	1.74	1.72
1.86	1.81	1.84	1.67	1.66	1.86			1.52	1.99	1.71	2.37	1.36	1.52			1.64	1.96	1.75	2.5	1.59	1.64
1.59	2.18	1.71	1.61	1.74	1.59			1.96	2.07	1.75	1.84	1.52	1.96			1.9	2.87	1.92	1.79	1.94	1.9
2.33	2.23	1.83	1.86	1.97	2.33			1.73	1.45	2.14	2.39	1.62	1.73			2.25	2.13	2.03	3.04	2.23	2.25
1.98	1.81	1.9	1.84	1.71	1.98			1.5	2.18	1.72	1.86	1.3	1.5			1.92	1.68	1.59	2.45	1.74	1.92
1.88	1.71	1.89	1.75	1.66	1.88			1.45	2.61	1.71	2.23	1.32	1.45			1.78	1.76	1.69	2.42	1.58	1.78
1.58	2.16	1.92	1.75	1.89	1.58			1.83	2.18	2.29	1.86	1.6	1.83			1.86	1.99	1.99	1.9	1.81	1.86
2.53	2.08	1.75	1.92	2.05	2.53			1.72	1.49	2.12	1.99	1.62	1.72			2.42	2.53	1.87	3.13	2.38	2.42
2.1	1.77	1.86	1.83	1.76	2.1			1.54	2.32	1.66	1.79	1.35	1.54			1.82	1.72	1.63	2.39	1.76	1.82
2.01	1.65	1.86	1.8	1.66	2.01			1.4	2.59	1.65	1.95	1.35	1.4			1.98	1.62	1.83	2.13	1.57	1.98
1.63	2.58	1.93	1.9	1.76	1.63			1.71	2.08	2.14	1.76	1.83	1.71			2.01	1.94	2.14	1.95	1.72	2.01
2.56	2.02	1.7	2.09	2.08	2.56			1.66	1.56	1.98	1.93	1.54	1.66			1.89	2.74	2.17	2.73	2.2	1.89
2.19	1.72	1.79	1.78	1.74	2.19			1.49	1.99	1.62	1.72	1.42	1.49			1.72	1.91	1.9	2.23	1.67	1.72
2.07	1.6	1.81	1.78	1.62	2.07			1.45	2.41	1.61	1.91	1.41	1.45			1.63	1.56	2.07	1.83	1.63	1.63
1.69	2.7	2.04	2.05	1.77	1.69			2.14	1.96	2.67	1.69	1.66	2.14			2.04	1.74	2.3	1.93	1.83	2.04
2.66	2.03	1.73	2.08	2.05	2.66			1.56	1.67	1.75	1.94	1.54	1.56			1.88	2.62	2.35	3.03	2.18	1.88
2.2	1.7	1.78	1.77	1.73	2.2			1.47	1.8	1.65	1.68	1.47	1.47			1.56	1.78	1.95	2.07	1.77	1.56
2.1	1.59	1.77	1.72	1.61	2.1			1.45	2.05	1.59	1.92	1.47	1.45			1.58	1.55	1.91	1.62	1.78	1.58
1.69	3.35	1.84	1.88	2.21	1.69			2.24	1.87	2.46	1.71	2.12	2.24			1.99	1.8	2.05	1.86	2.02	1.99
	2.34		1.8	2	1.96			1.51	1.74	1.65		1.62	1.51			2.25	2.61	2.3	2.98	4.28	2.25
	1.75		1.74	1.81	1.85			1.45	1.57	1.68		1.55	1.45			1.5	1.85	1.94	1.86	3	1.5
	1.65		1.69	1.63	1.84			1.44	1.61	1.59		1.53	1.44			1.52	1.55	1.86	1.62	2.25	1.52
	2.07		2.24	1.88	1.95			1.91	2.05	1.81		1.82	1.91			1.8	1.74	1.98	1.89	2.26	1.8
			1.69	1.88	2			1.53	1.74	1.62		1.68	1.53			2.79	2.3	2.31	2.71	2.97	2.79
			1.76	1.81	1.85			1.53	1.55	1.71		1.69	1.53			1.67	1.7	1.88	1.8	2.27	1.67
			1.68	1.61	1.82			1.5	1.61	1.59		1.63	1.5			1.47	1.58	1.85	1.81	1.92	1.47
			2.43	2.38	1.91			2.11	1.72	1.82		1.87	2.11			1.65	1.78	2.54	2.03	2.3	1.65
			1.67	1.79	2.1			1.64	1.73	1.6		1.7	1.64			3.49	2.21	2.25	2.68	2.36	3.49
			1.78	1.85	1.85			1.65	1.59	1.72		1.7	1.65			1.85	1.65	1.84	2.07	2.05	1.85
			1.73	1.67	1.79			1.64	1.61	1.62		1.65	1.64			1.47	1.72	1.92	2.05	2.04	1.47
			2.19	1.9	1.85			2.39	1.8	1.82		1.92	2.39			1.54	1.95	2.86	3.19	2.62	1.54
			1.75	1.79	2.12			1.73	1.72	1.62		1.66	1.73			3.26	3.17		2.37	2.36	3.26
			1.84	1.85	1.84			1.71	1.64	1.72		1.7	1.71			1.88	1.82		2.81	2.02	1.88
			1.75	1.7	1.76			1.68	1.6	1.63		1.65	1.68			1.52	1.65		2.88	2.53	1.52
			2.21	1.9	1.89			2.35	1.75	1.87		1.83	2.35			1.56	1.93		3.99	3.44	1.56
			1.83	1.77	2.05			1.82	1.68	1.6		1.64	1.82			2.85	1.91		2.41	2.3	2.85
			1.88	1.81	1.85			1.69	1.65	1.67		1.66	1.69			1.95	1.65		2.4	2.11	1.95
			1.81	1.72	1.76			1.66	1.6	1.62		1.68	1.66			1.6	1.73		1.93	2.89	1.6
			2.12	1.98	1.87			2.11	1.97	1.77		1.89	2.11			1.79	2.03		3.88	4.63	1.79
			1.88	1.72	2.08			1.89	1.66	1.62		1.61	1.89			2.45	1.96			2.15	2.45
			1.93	1.81	1.88			1.58	1.68	1.62		1.66	1.58			1.83	1.71			2.44	1.83
			1.82	1.73	1.72			1.56	1.63	1.6		1.71	1.56			1.78	1.74			2.87	1.78
			2.35	2.24	1.78			1.74	2.1	1.67		1.93	1.74			2.07	2.11			3.56	2.07
			1.86	1.72	2.13			1.84	1.66	1.6		1.68	1.84				1.98				1.72
			1.92	1.87	1.86			1.49	1.68	1.62		1.72	1.49				1.74				1.46
			1.82	1.74	1.79			1.46	1.67	1.6		1.81	1.46				1.82				1.55
			2.37	1.83	1.77			1.77	1.83	1.77		1.99	1.77				2.1				2.24
			1.84	1.78	2.29			1.81	1.66	1.6		1.82	1.81				2.01				1.74
			1.86	1.93	1.85			1.43	1.68	1.62		1.78	1.43				1.8				1.44
			1.83	1.78	1.81			1.37	1.66	1.59		1.89	1.37				1.85				1.53
			2.37	2.08	2.18			1.93	2.18	1.67		2.02	1.93				2.23				2.07
			1.92	1.88	2.23			1.79	1.67	1.63		1.99	1.79				2.04				2
			1.85	1.96	1.81			1.43	1.7	1.63		1.8	1.43				1.8				1.44
			1.83	1.85	1.71			1.34	1.76	1.59		2.02	1.34				2.08				1.52
			2.2	2.03	2.16			1.99	1.81	1.97		1.97	1.99				2.61				1.95
			2	2.04	2.08			1.78	1.71	1.65		2.09	1.78								2.23
			1.88	2	1.77			1.45	1.76	1.64		1.75	1.45								1.54
			1.83	1.91	1.65			1.35	1.85	1.58		1.85	1.35								1.49
			1.92	2.31	2.58			2.16	1.93	1.84		1.93	2.16								1.92
				2.4	2.02			1.87	1.72	1.62		2.07	1.87								2.44
				2.03	1.72			1.57	1.81	1.62		1.67	1.57								1.8
				1.95	1.6			1.37	1.91	1.55		1.67	1.37								1.5
				2.26	2.7			2.16	1.83	1.78		1.87	2.16								1.87
				2.69	2.03			1.96	1.76	1.55		2.03	1.96								2.49
				2.06	1.7			1.68	1.89	1.6		1.59	1.68								1.97
				1.97	1.59			1.38	1.93	1.54		1.55	1.38								1.69
				2.14	3.35			2.05	1.81	1.61		1.9	2.05								1.98
				2.29	2.34			2.1	1.74	1.42		1.83	2.1								2.33
				2.04	1.75			1.87	1.88	1.53		1.51	1.87								1.99
				1.95	1.65			1.42	1.91	1.5		1.46	1.42								2.01
				2.08	2.07			2.1	1.76	1.69		2	2.1								2.4
					1.94			2.31	1.71	1.33		1.71	2.31								2.42
					1.84			1.79	1.82	1.49		1.51	1.79								2.06
					1.73			1.46	1.79	1.49		1.43	1.46								1.96
					2.02			2.7	1.71	1.68		1.77	2.7								2.87
					2			2.26	1.7	1.3		1.59	2.26								2.13
					1.87			1.84	1.73	1.47		1.49	1.84								1.68
					1.73			1.49	1.66	1.46		1.48	1.49								1.76
					1.84			2.19	1.81	1.72		2.2	2.19								1.99
					2.01				1.68	1.26			1.25								2.53
					1.85				1.7	1.44			1.49								1.72
					1.73				1.6	1.44			1.56								1.62
					1.77				1.74	1.96			1.94								1.94
					1.91					1.16			1.25								2.74
					1.83					1.37			1.53								1.91
					1.72					1.42			1.57								1.56
					1.7					1.69			3.24								1.74
					1.94								1.36								2.62
					1.83								1.53								1.78
					1.75								1.56								1.55
					1.62								3.83								1.8
					2.04								1.31								2.61
					1.84								1.51								1.85
					1.69								1.55								1.55
					1.62								2.02								1.74
					2.02								1.37								2.3
					1.88								1.57								1.7
					1.75								1.6								1.58
					1.61								2.33								1.78
					1.95								1.41								2.21
					1.88								1.59								1.65
					1.84								1.62								1.72
					1.71								2.03								1.95
					1.83								1.43								3.17
					1.9								1.66								1.82
					1.89								1.72								1.65
					1.92								2.31								1.93
					1.75								1.45								1.91
					1.86								1.81								1.65
					1.86								1.99								1.73
					1.93								2.07								2.03
					1.7								1.45								1.96
					1.79								2.18								1.71
					1.81								2.61								1.74
					2.04								2.18								2.11
					1.73								1.49								1.98
					1.78								2.32								1.74
					1.77								2.59								1.82
					1.84								2.08								2.1
					1.98								1.56								2.01
					1.98								1.99								1.8
					1.87								2.41								1.85
					1.62								1.96								2.23
					1.93								1.67								2.04
					1.93								1.8								1.8
					1.82								2.05								2.08
					1.63								1.87								2.61
					1.93								1.74								1.84
					1.87								1.57								1.41
					1.8								1.61								1.42
					1.62								2.05								1.67
					1.9								1.74								1.83
					1.79								1.55								1.42
					1.73								1.61								1.39
					1.62								1.72								1.63
					1.82								1.73								1.77
					1.71								1.59								1.42
					1.69								1.61								1.41
					1.61								1.8								1.64
					1.8								1.72								1.91
					1.71								1.64								1.57
					1.67								1.6								1.44
					1.64								1.75								1.65
					1.77								1.68								2.83
					1.78								1.65								1.95
					1.67								1.6								1.78
					1.6								1.97								1.94
					1.76								1.66								2.36
					1.79								1.68								1.7
					1.67								1.63								1.77
					1.61								2.1								1.96
					1.86								1.66								2.11
					1.84								1.68								1.68
					1.75								1.67								1.71
					1.75								1.83								1.9
					1.92								1.66								1.88
					1.83								1.68								1.59
					1.8								1.66								1.75
					1.9								2.18								1.92
					2.09								1.67								2.03
					1.78								1.7								1.59
					1.78								1.76								1.69
					2.05								1.81								1.99
					2.08								1.71								1.87
					1.77								1.76								1.63
					1.72								1.85								1.83
					1.88								1.93								2.14
					1.8								1.72								2.17
					1.74								1.81								1.9
					1.69								1.91								2.07
					2.24								1.83								2.3
					1.69								1.76								2.35
					1.76								1.89								1.95
					1.68								1.93								1.91
					2.43								1.81								2.05
					1.67								1.74								2.3
					1.78								1.88								1.94
					1.73								1.91								1.86
					2.19								1.76								1.98
					1.75								1.71								2.31
					1.84								1.82								1.88
					1.75								1.79								1.85
					2.21								1.71								2.54
					1.83								1.7								2.25
					1.88								1.73								1.84
					1.81								1.66								1.92
					2.12								1.81								2.86
					1.88								1.68								1.71
					1.93								1.7								1.51
					1.82								1.6								1.33
					2.35								1.74								2.22
					1.86								1.72								1.75
					1.92								1.55								1.54
					1.82								1.51								1.39
					2.37								1.89								2
					1.84								1.7								1.81
					1.86								1.5								1.56
					1.83								1.5								1.47
					2.37								1.82								1.81
					1.92								1.7								2.07
					1.85								1.51								1.71
					1.83								1.5								1.65
					2.2								2.14								1.74
					2								1.69								2.35
					1.88								1.54								2.03
					1.83								1.53								1.68
					1.92								1.62								1.86
					2.2								1.73								2.46
					1.97								1.58								1.99
					1.85								1.58								1.69
					1.75								1.9								1.83
					2.13								1.8								2.12
					1.92								1.62								2.43
					1.81								1.6								1.7
					1.73								1.98								1.74
					2.13								1.89								2.14
					1.91								1.65								2.01
					1.81								1.63								2.5
					1.73								2.02								1.79
					2.07								2								3.04
					1.87								1.72								2.45
					1.77								1.71								2.42
					1.75								1.75								1.9
					1.99								2.14								3.13
					1.82								1.72								2.39
					1.73								1.71								2.13
					1.76								2.29								1.95
					1.91								2.12								2.73
					1.81								1.66								2.23
					1.68								1.65								1.83
					1.76								2.14								1.93
					1.9								1.98								3.03
					1.78								1.62								2.07
					1.68								1.61								1.62
					1.74								2.67								1.86
					1.91								1.75								2.98
					1.73								1.65								1.86
					1.66								1.59								1.62
					1.74								2.46								1.89
					1.97								1.65								2.71
					1.71								1.68								1.8
					1.66								1.59								1.81
					1.89								1.81								2.03
					2.05								1.62								2.68
					1.76								1.71								2.07
					1.66								1.59								2.05
					1.76								1.82								3.19
					2.08								1.6								2.37
					1.74								1.72								2.81
					1.62								1.62								2.88
					1.77								1.82								3.99
					2.05								1.62								2.41
					1.73								1.72								2.4
					1.61								1.63								1.93
					2.21								1.87								3.88
					2								1.6								1.72
					1.81								1.67								1.69
					1.63								1.62								1.68
					1.88								1.77								1.94
					1.88								1.62								1.74
					1.81								1.62								1.65
					1.61								1.6								1.64
					2.38								1.67								1.85
					1.79								1.6								1.75
					1.85								1.62								1.55
					1.67								1.6								1.59
					1.9								1.77								1.8
					1.79								1.6								1.76
					1.85								1.62								1.48
					1.7								1.59								1.56
					1.9								1.67								1.75
					1.77								1.63								1.8
					1.81								1.63								1.41
					1.72								1.59								1.52
					1.98								1.97								1.75
					1.72								1.65								1.92
					1.81								1.64								1.88
					1.73								1.58								1.58
					2.24								1.84								1.73
					1.72								1.62								2.08
					1.87								1.62								1.59
					1.74								1.55								1.59
					1.83								1.78								2.04
					1.78								1.55								2.13
					1.93								1.6								1.74
					1.78								1.54								1.59
					2.08								1.61								1.94
					1.88								1.42								2.23
					1.96								1.53								1.74
					1.85								1.5								1.58
					2.03								1.69								1.81
					2.04								1.33								2.38
					2								1.49								1.76
					1.91								1.49								1.57
					2.31								1.68								1.72
					2.4								1.3								2.2
					2.03								1.47								1.67
					1.95								1.46								1.63
					2.26								1.72								1.83
					2.69								1.26								2.18
					2.06								1.44								1.77
					1.97								1.44								1.78
					2.14								1.96								2.02
					2.29								1.16								4.28
					2.04								1.37								3
					1.95								1.42								2.25
					2.08								1.69								2.26
													2.19								2.97
													1.83								2.27
													2.15								1.92
													1.82								2.3
													2.13								2.36
													1.74								2.05
													2.09								2.04
													1.59								2.62
													2.07								2.36
													1.45								2.02
													2.14								2.53
													1.42								3.44
													2.04								2.3
													1.32								2.11
													2.01								2.89
													1.34								4.63
													1.95								2.15
													1.31								2.44
													1.81								2.87
													1.32								3.56
													1.75
													1.33
													1.82
													1.44
													1.88
													1.52
													2.09
													1.72
													2.3
													1.76
													2.37
													1.84
													2.39
													1.86
													2.23
													1.86
													1.99
													1.79
													1.95
													1.76
													1.93
													1.72
													1.91
													1.69
													1.94
													1.68
													1.92
													1.71
													2.06
													1.63
													1.63
													1.93
													2.24
													1.73
													1.76
													1.93
													2.21
													1.74
													1.84
													2.13
													2.16
													1.97
													2.22
													2.09
													2.07
													2.2
													2.63
													2.09
													1.8
													2.25
													2.29
													1.9
													1.78
													1.68
													1.84
													1.71
													1.76
													1.37
													1.36
													1.52
													1.62
													1.3
													1.32
													1.6
													1.62
													1.35
													1.35
													1.83
													1.54
													1.42
													1.41
													1.66
													1.54
													1.47
													1.47
													2.12
													1.62
													1.55
													1.53
													1.82
													1.68
													1.69
													1.63
													1.87
													1.7
													1.7
													1.65
													1.92
													1.66
													1.7
													1.65
													1.83
													1.64
													1.66
													1.68
													1.89
													1.61
													1.66
													1.71
													1.93
													1.68
													1.72
													1.81
													1.99
													1.82
													1.78
													1.89
													2.02
													1.99
													1.8
													2.02
													1.97
													2.09
													1.75
													1.85
													1.93
													2.07
													1.67
													1.67
													1.87
													2.03
													1.59
													1.55
													1.9
													1.83
													1.51
													1.46
													2
													1.71
													1.51
													1.43
													1.77
													1.59
													1.49
													1.48
													2.2

## Sheet: (3) Case F
Pre One (m/s)	Pre Two (m/s)	Pre Three (m/s)	Pre Four (m/s)	All Pre	Means of Pre		Mid One (m/s)	Mid Two (m/s)	Mid Three (m/s)	Mid Four (m/s)	Mid Five (m/s)	Mid Six (m/s)	All Mid	Means of Mid		Full One (m/s)	Full Two (m/s)	Full Three (m/s)	Full Four (m/s)	Full Five (m/s)	Full Six (m/s)	All Full	Means of Full
2.28	2.15	3.14	2.8	2.28	2.0317		1.69	0.45	1.39	1.38	1.35	1.36	1.69	1.37872		2.08	1.46	1.76	1.48	1.75	1.87	2.08	1.8265
2.21	2.09	2.27	2.17	2.21	1.91341		1.45	1.51	1.35	1.38	1.36	1.39	1.45	1.39073		1.97	1.72	2.01	1.4	1.45	1.54	1.97	1.69
2.44	2.21	2.07	1.98	2.44	2.1492		1.32	1.27	1.4	1.51	1.49	1.48	1.32	1.26613		1.75	1.76	2.31	1.42	1.4	1.46	1.75	2.64138
3.34	3.08	3.01	2.13	3.34	2.06325		1.45	1.49	1.51	1.58	1.59	1.61	1.45	1.43661		1.78	1.7	2.96	1.6	1.64	1.5	1.78	1.54382
2.35	2.11	2.78	2.73	2.35			1.73	1.7	1.35	1.42	1.38	1.51	1.73	1.42319		1.6	1.54	1.76	1.54	1.79	1.66	1.6	1.5925
2.23	2.03	2.33	2.09	2.23			1.56	1.45	1.32	1.48	1.37	1.57	1.56	1.56112		1.64	1.71	2.03	1.37	1.48	1.93	1.64	1.668
2.35	1.94	2.04	1.98	2.35			1.36	1.27	1.37	1.61	1.51	1.77	1.36			1.66	1.69	2.49	1.39	1.43	1.61	1.66
3.25	2.65	2.78	2.11	3.25			1.41	1.76	1.45	1.58	1.62	1.77	1.41			1.69	1.66	4.03	1.67	1.69	1.47	1.69
2.42	2.07	2.62	2.53	2.42			1.7	2.59	1.31	1.5	1.36	1.64	1.7			1.49	1.59	1.55	1.96	1.83	1.5	1.49
2.2	1.96	2.27	2.11	2.2			1.44	1.52	1.31	1.54	1.36	1.79	1.44			1.55	1.69	1.67	1.35	1.55	1.62	1.55
2.36	1.88	2.03	1.99	2.36			1.39	1.24	1.36	1.64	1.48	2.17	1.39			1.6	1.65	1.95	1.36	1.43	2.46	1.6
2.99	2.33	2.78	2.05	2.99			1.42	1.77	1.42	1.56	1.62	1.96	1.42			1.7	1.65	3.04	1.51	1.67	1.74	1.7
2.55	2.03	2.46	2.36	2.55			1.65	2.43	1.3	1.58	1.34	1.72	1.65			2.19	1.76	1.5	2.83		1.54	2.19
2.24	1.9	2.19	2.08	2.24			1.42	1.34	1.3	1.55	1.32	2	1.42			1.8	1.71	1.57	1.37		1.54	1.8
2.12	1.82	2	2.05	2.12			1.4	1.28	1.35	1.6	1.38	2.43	1.4			1.8	1.9	1.67	1.35		1.58	1.8
2.1	2.03	2.91	2.05	2.1			1.42	1.68	1.39	1.52	1.61	2.1	1.42			1.81	1.85	2.04	1.51			1.81
2.57	1.99	2.31	2.21	2.57			1.56	2.25	1.27	1.68	1.35	1.66	1.56			2.06		0.27	2.97			2.06
2.26	1.9	2.11	2.07	2.26			1.35	1.34	1.29	1.55	1.31	1.98	1.35			2.3		2.72	1.47			2.3
2.1	1.78	2.01	2.14	2.1			1.36	1.23	1.34	1.56	1.31	2.26	1.36			2.14		2.35	1.37			2.14
1.98	1.85	2.47	2.04	1.98			1.41	1.47	1.38	1.5	1.52	1.8	1.41			1.92		1.71	1.3			1.92
2.46	1.95	2.3	2.09	2.46			1.45	1.1	1.25	1.81	1.35	1.18	1.45					4.92	1.37			1.46
2.22	1.86	2.14	2.6	2.22			1.25	1.22	1.28	1.56	1.32	1.79	1.25					3.83	1.47			1.72
2.14	1.77	2	2.17	2.14			1.28	1.18	1.33	1.53	1.35	2.05	1.28					2.72	1.48			1.76
2.45	1.67	2.13	1.93	2.45			0.9	1.3	1.33	1.5	1.49	1.65	0.9					2.24	1.36			1.7
2.43	1.89	2.33	1.98	2.43			1.36	1.86	1.27	1.86	1.36	1.16	1.36					4.6	0.98			1.54
2.26	1.87	2.14	1.98	2.26			1.18	1.17	1.29	1.61	1.38	1.57	1.18					2.61	1.43			1.71
2.21	1.8	2	2.11	2.21			1.21	1.16	1.32	1.56	1.51	1.75	1.21					5.47	1.43			1.69
2.87	1.61	1.98	1.89	2.87			0.88	1.25	1.32	1.5	1.43	1.59	0.88					6.68	1.39			1.66
2.35	1.78	2.33	1.87	2.35			1.34	1.88	1.28	1.84	1.37	1.14	1.34					2.14	1.39			1.59
2.34	1.86	2.14	1.9	2.34			1.18	1.19	1.29	1.61	1.41	1.46	1.18						1.34			1.69
2.34	1.84	1.98	2	2.34			1.19	1.18	1.29	1.57	1.57	1.52	1.19						1.31			1.65
2.46	1.59	1.96	1.97	2.46			0.95	1.25	1.29	1.45	1.35	1.64	0.95						1.21			1.65
2.33	1.74	2.3	1.81	2.33			1.43	1.84	1.31	1.39	1.46	1.48	1.43						1.19			1.76
2.33	1.85	2.19	1.81	2.33			1.2	1.27	1.26	1.52	1.44	1.4	1.2						1.21			1.71
2.34	1.8	1.97	1.93	2.34			1.17	1.3	1.25	1.49	1.48	1.43	1.17						1.23			1.9
2.21	1.56	1.98	1.86	2.21			0.89	1.3	1.2	1.33	1.28	1.61	0.89						0.38			1.85
2.12	1.73	2.24	1.69	2.12			1.46	1.69	1.3	1.02	1.5	1.52	1.46						1.21			1.76
2.15	1.82	2.01	1.72	2.15			1.21	1.38	1.25	1.35	1.41	1.35	1.21						1.22			2.01
2.13	1.82	1.92	1.82	2.13			1.17	1.38	1.22	1.15	1.34	1.34	1.17						1.03			2.31
1.77	1.57	1.98	1.73	1.77			1.03	1.36	1.11	0.31	1.26	1.51	1.03						1.33			2.96
1.9	1.72	2.26		1.9			1.46	1.56	1.3	1.02	1.47	1.44	1.46						1.39			1.76
2.03	1.82	2.03		2.03			1.19	1.48	1.22	1.14	1.3	1.28	1.19						1.74			2.03
2.04	1.81	1.93		2.04			1.18	1.33	1.19	1.03	1.29	1.32	1.18						1.14			2.49
1.73	1.66	1.94		1.73			1.25	1.33	1.03	1.61	1.25	1.47	1.25						1.43			4.03
1.88		2.27		1.88			1.5	1.51	1.32	1.12	1.37	1.03	1.5						1.54			1.55
1.9		2.07		1.9			1.21	1.49	1.26	0.98	1.24	1.52	1.21						2.05			1.67
1.92		2.01		1.92			1.2	1.33	1.2	1.69	1.26	1.32	1.2						2.65			1.95
1.68		2.15		1.68			1.31	1.33	0.92	1.15	1.25	1.41	1.31						1.59			3.04
1.87		2.27		1.87			1.73	1.45	1.33	1.11	1.33	0.24	1.73						2.04			1.5
1.83		2.11		1.83			1.27	1.43	1.35	0.93	1.24	1.66	1.27						1.86			1.57
1.83		2.09		1.83			1.21	1.35	1.29	1.58	1.25	1.34	1.21						2.5			1.67
1.68		2.31		1.68			1.25	1.25	1.03	1.2	1.25	1.4	1.25						1.74			2.04
1.94		2.41		1.94			1.88	1.43	0.46	1.17	1.55	1.66	1.88						2.58			0.27
1.79		2.14		1.79			1.3	1.4	1.4	0.71	1.27	1.57	1.3						1.97			2.72
1.79		2.12		1.79			1.23	1.31	1.34	1.55	1.27	1.36	1.23						1.51			2.35
1.76		2.34		1.76			1.2	1.2	1.05	1.54	0.68	1.33	1.2									1.71
1.95		2.55		1.95			1.84	1.44	0.82	1.54	1.95	1.93	1.84									4.92
1.74		2.15		1.74			1.35	1.4	1.4	1.3	1.34	1.53	1.35									3.83
1.77		2.12		1.77			1.24	1.27	1.37	1.45	1.43	1.36	1.24									2.72
1.81		2.22		1.81			1.21	1.17	1.16	1.9	0.7	1.26	1.21									2.24
1.86		2.64		1.86			1.69	1.45	0.73	1.98	1.86	1.56	1.69									4.6
1.7		2.15		1.7			1.38	1.43	1.37	1.69	1.35	1.47	1.38									2.61
1.69		2.05		1.69			1.23	1.23	1.33		1.63	1.38	1.23									5.47
1.72		2.08		1.72			1.2	1.13	1.04		1.51	1.27	1.2									6.68
1.84		2.56		1.84			1.56	1.5	1.75		1.53	1.52	1.56									2.14
1.69		2		1.69			1.37	1.41	1.3		1.57	1.75	1.37									1.48
1.69		1.86		1.69			1.21	1.21	1.28		1.51	1.56	1.21									1.4
1.38		1.84		1.38			1.26	1.04	0.92		1.81	1.23	1.26									1.42
1.83		2.59		1.83			1.64	1.52	1.67		1.81	1.65	1.64									1.6
1.7		1.95		1.7			1.39	1.42	1.26		1.08	1.95	1.39									1.54
1.72		1.75		1.72			1.19	1.21	1.26		2.21	1.8	1.19									1.37
1.34		1.78		1.34			2.27	1.02	0.96		2.22	1.32	2.27									1.39
1.9		2.48		1.9			1.68	1.57	1.61			1.74	1.68									1.67
1.72		1.92		1.72			1.3	1.4	1.29			1.67	1.3									1.96
1.72		1.7		1.72			1.32	1.2	1.27			1.49	1.32									1.35
1.42		1.69		1.42			2.34	1.03	0.96			1.37	2.34									1.36
1.98		2.15		1.98			1.67	1.62	1.44			1.97	1.67									1.51
1.74		1.85		1.74			1.29	1.38	1.33			1.59	1.29									2.83
1.7		1.69		1.7			1.15	1.21	1.38			1.51	1.15									1.37
1.52		1.71		1.52			0.46	1.07	1.1			1.55	0.46									1.35
1.96		2.02		1.96			1.52	1.61					1.52									1.51
1.73		1.87		1.73			1.2	1.43					1.2									2.97
1.71		1.69		1.71			1.14	1.27					1.14									1.47
1.1		1.65		1.1			0.87	1.12					0.87									1.37
2.03		2.17		2.03			2.22	1.53					2.22									1.3
1.75		1.87		1.75			1.19	1.49					1.19									1.37
1.71		1.68		1.71			1.19	1.29					1.19									1.47
1.85		1.65		1.85			0.35	1.13					0.35									1.48
				2.15			3.44	1.47					3.44									1.36
				2.09			1.25	1.43					1.25									0.98
				2.21			1.19	1.28					1.19									1.43
				3.08			2.85	1.18					2.85									1.43
				2.11			1.22	1.43					1.22									1.39
				2.03			1.14	1.46					1.14									1.39
				1.94				1.35					0.45									1.34
				2.65				1.23					1.51									1.31
				2.07									1.27									1.21
				1.96									1.49									1.19
				1.88									1.7									1.21
				2.33									1.45									1.23
				2.03									1.27									0.38
				1.9									1.76									1.21
				1.82									2.59									1.22
				2.03									1.52									1.03
				1.99									1.24									1.33
				1.9									1.77									1.39
				1.78									2.43									1.74
				1.85									1.34									1.14
				1.95									1.28									1.43
				1.86									1.68									1.54
				1.77									2.25									2.05
				1.67									1.34									2.65
				1.89									1.23									1.59
				1.87									1.47									2.04
				1.8									1.1									1.86
				1.61									1.22									2.5
				1.78									1.18									1.74
				1.86									1.3									2.58
				1.84									1.86									1.97
				1.59									1.17									1.51
				1.74									1.16									1.75
				1.85									1.25									1.45
				1.8									1.88									1.4
				1.56									1.19									1.64
				1.73									1.18									1.79
				1.82									1.25									1.48
				1.82									1.84									1.43
				1.57									1.27									1.69
				1.72									1.3									1.83
				1.82									1.3									1.55
				1.81									1.69									1.43
				1.66									1.38									1.67
				3.14									1.38									1.87
				2.27									1.36									1.54
				2.07									1.56									1.46
				3.01									1.48									1.5
				2.78									1.33									1.66
				2.33									1.33									1.93
				2.04									1.51									1.61
				2.78									1.49									1.47
				2.62									1.33									1.5
				2.27									1.33									1.62
				2.03									1.45									2.46
				2.78									1.43									1.74
				2.46									1.35									1.54
				2.19									1.25									1.54
				2									1.43									1.58
				2.91									1.4
				2.31									1.31
				2.11									1.2
				2.01									1.44
				2.47									1.4
				2.3									1.27
				2.14									1.17
				2									1.45
				2.13									1.43
				2.33									1.23
				2.14									1.13
				2									1.5
				1.98									1.41
				2.33									1.21
				2.14									1.04
				1.98									1.52
				1.96									1.42
				2.3									1.21
				2.19									1.02
				1.97									1.57
				1.98									1.4
				2.24									1.2
				2.01									1.03
				1.92									1.62
				1.98									1.38
				2.26									1.21
				2.03									1.07
				1.93									1.61
				1.94									1.43
				2.27									1.27
				2.07									1.12
				2.01									1.53
				2.15									1.49
				2.27									1.29
				2.11									1.13
				2.09									1.47
				2.31									1.43
				2.41									1.28
				2.14									1.18
				2.12									1.43
				2.34									1.46
				2.55									1.35
				2.15									1.23
				2.12									1.39
				2.22									1.35
				2.64									1.4
				2.15									1.51
				2.05									1.35
				2.08									1.32
				2.56									1.37
				2									1.45
				1.86									1.31
				1.84									1.31
				2.59									1.36
				1.95									1.42
				1.75									1.3
				1.78									1.3
				2.48									1.35
				1.92									1.39
				1.7									1.27
				1.69									1.29
				2.15									1.34
				1.85									1.38
				1.69									1.25
				1.71									1.28
				2.02									1.33
				1.87									1.33
				1.69									1.27
				1.65									1.29
				2.17									1.32
				1.87									1.32
				1.68									1.28
				1.65									1.29
				2.8									1.29
				2.17									1.29
				1.98									1.31
				2.13									1.26
				2.73									1.25
				2.09									1.2
				1.98									1.3
				2.11									1.25
				2.53									1.22
				2.11									1.11
				1.99									1.3
				2.05									1.22
				2.36									1.19
				2.08									1.03
				2.05									1.32
				2.05									1.26
				2.21									1.2
				2.07									0.92
				2.14									1.33
				2.04									1.35
				2.09									1.29
				2.6									1.03
				2.17									0.46
				1.93									1.4
				1.98									1.34
				1.98									1.05
				2.11									0.82
				1.89									1.4
				1.87									1.37
				1.9									1.16
				2									0.73
				1.97									1.37
				1.81									1.33
				1.81									1.04
				1.93									1.75
				1.86									1.3
				1.69									1.28
				1.72									0.92
				1.82									1.67
				1.73									1.26
													1.26
													0.96
													1.61
													1.29
													1.27
													0.96
													1.44
													1.33
													1.38
													1.1
													1.38
													1.38
													1.51
													1.58
													1.42
													1.48
													1.61
													1.58
													1.5
													1.54
													1.64
													1.56
													1.58
													1.55
													1.6
													1.52
													1.68
													1.55
													1.56
													1.5
													1.81
													1.56
													1.53
													1.5
													1.86
													1.61
													1.56
													1.5
													1.84
													1.61
													1.57
													1.45
													1.39
													1.52
													1.49
													1.33
													1.02
													1.35
													1.15
													0.31
													1.02
													1.14
													1.03
													1.61
													1.12
													0.98
													1.69
													1.15
													1.11
													0.93
													1.58
													1.2
													1.17
													0.71
													1.55
													1.54
													1.54
													1.3
													1.45
													1.9
													1.98
													1.69
													1.35
													1.36
													1.49
													1.59
													1.38
													1.37
													1.51
													1.62
													1.36
													1.36
													1.48
													1.62
													1.34
													1.32
													1.38
													1.61
													1.35
													1.31
													1.31
													1.52
													1.35
													1.32
													1.35
													1.49
													1.36
													1.38
													1.51
													1.43
													1.37
													1.41
													1.57
													1.35
													1.46
													1.44
													1.48
													1.28
													1.5
													1.41
													1.34
													1.26
													1.47
													1.3
													1.29
													1.25
													1.37
													1.24
													1.26
													1.25
													1.33
													1.24
													1.25
													1.25
													1.55
													1.27
													1.27
													0.68
													1.95
													1.34
													1.43
													0.7
													1.86
													1.35
													1.63
													1.51
													1.53
													1.57
													1.51
													1.81
													1.81
													1.08
													2.21
													2.22
													1.36
													1.39
													1.48
													1.61
													1.51
													1.57
													1.77
													1.77
													1.64
													1.79
													2.17
													1.96
													1.72
													2
													2.43
													2.1
													1.66
													1.98
													2.26
													1.8
													1.18
													1.79
													2.05
													1.65
													1.16
													1.57
													1.75
													1.59
													1.14
													1.46
													1.52
													1.64
													1.48
													1.4
													1.43
													1.61
													1.52
													1.35
													1.34
													1.51
													1.44
													1.28
													1.32
													1.47
													1.03
													1.52
													1.32
													1.41
													0.24
													1.66
													1.34
													1.4
													1.66
													1.57
													1.36
													1.33
													1.93
													1.53
													1.36
													1.26
													1.56
													1.47
													1.38
													1.27
													1.52
													1.75
													1.56
													1.23
													1.65
													1.95
													1.8
													1.32
													1.74
													1.67
													1.49
													1.37
													1.97
													1.59
													1.51
													1.55
